# Supplementary material
Source: PubMed Central journal article supplement (PMC4135790)
Supplement: EC.00074-14_zek999094311so1.pdf [file EC.00074-14_zek999094311so1.pdf]

**Table S1: Peak identifications according to NIST database search.** Spectra of measured peaks are shown on the left. For a positive identification by NIST database search, the spectrum of the corresponding compound is shown on the right side.

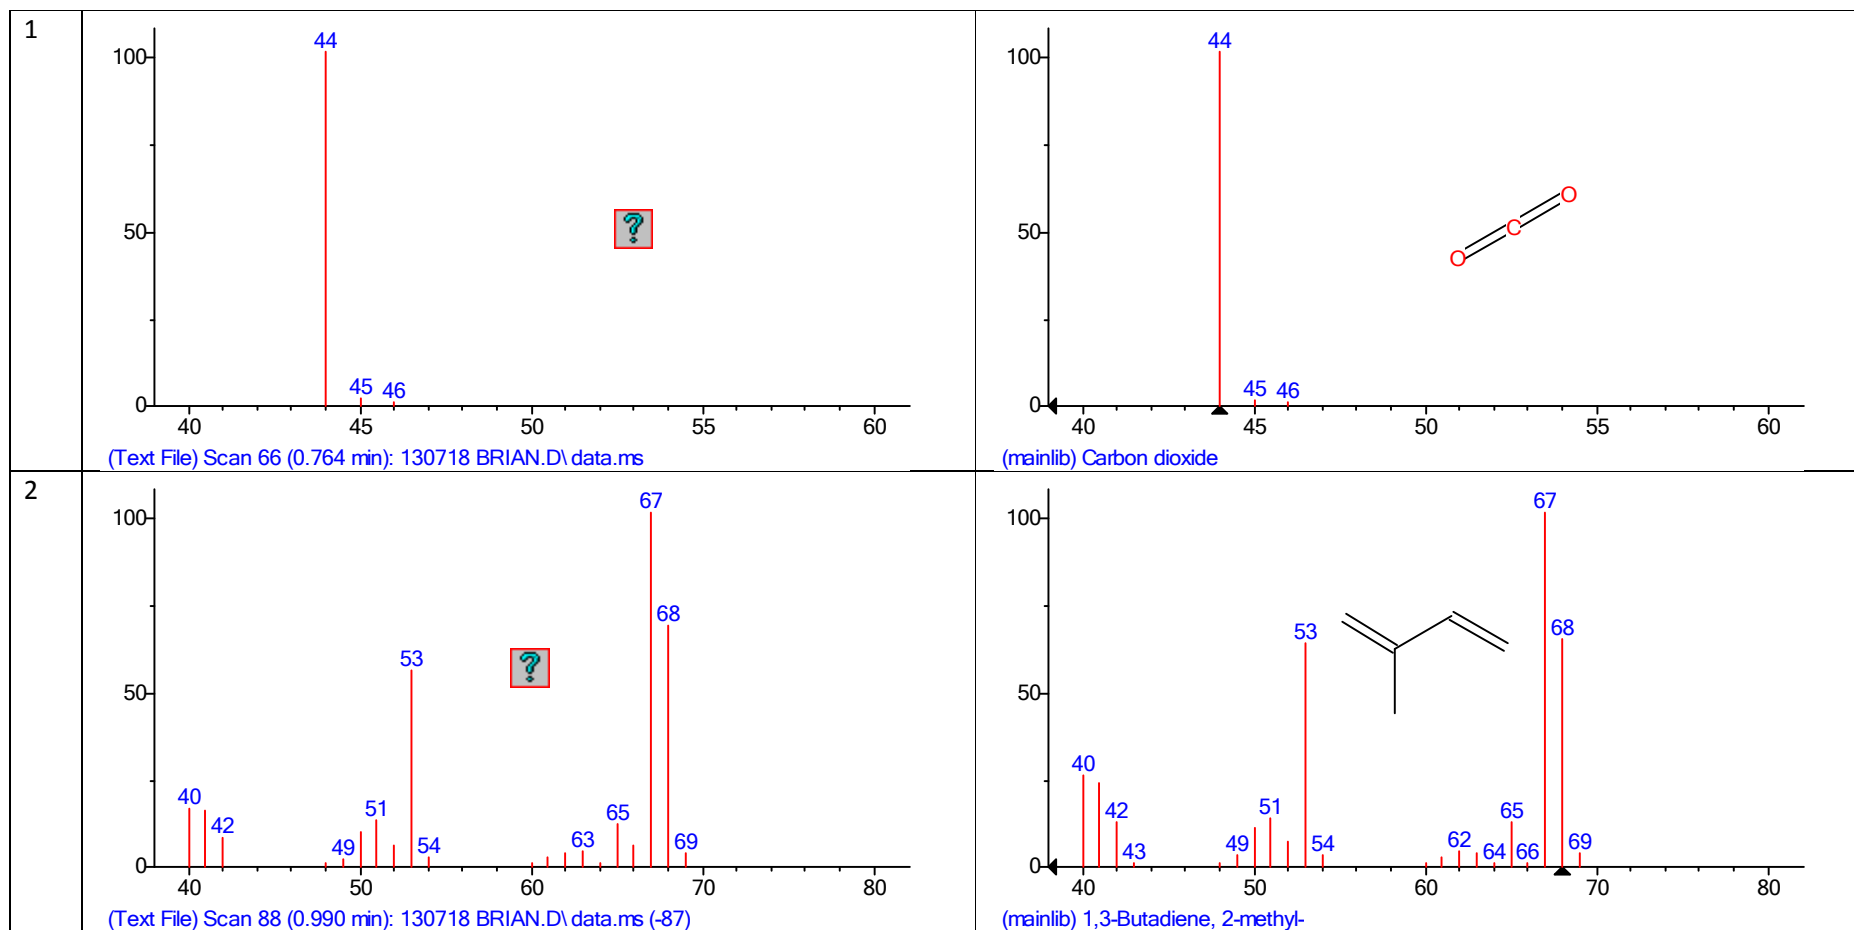

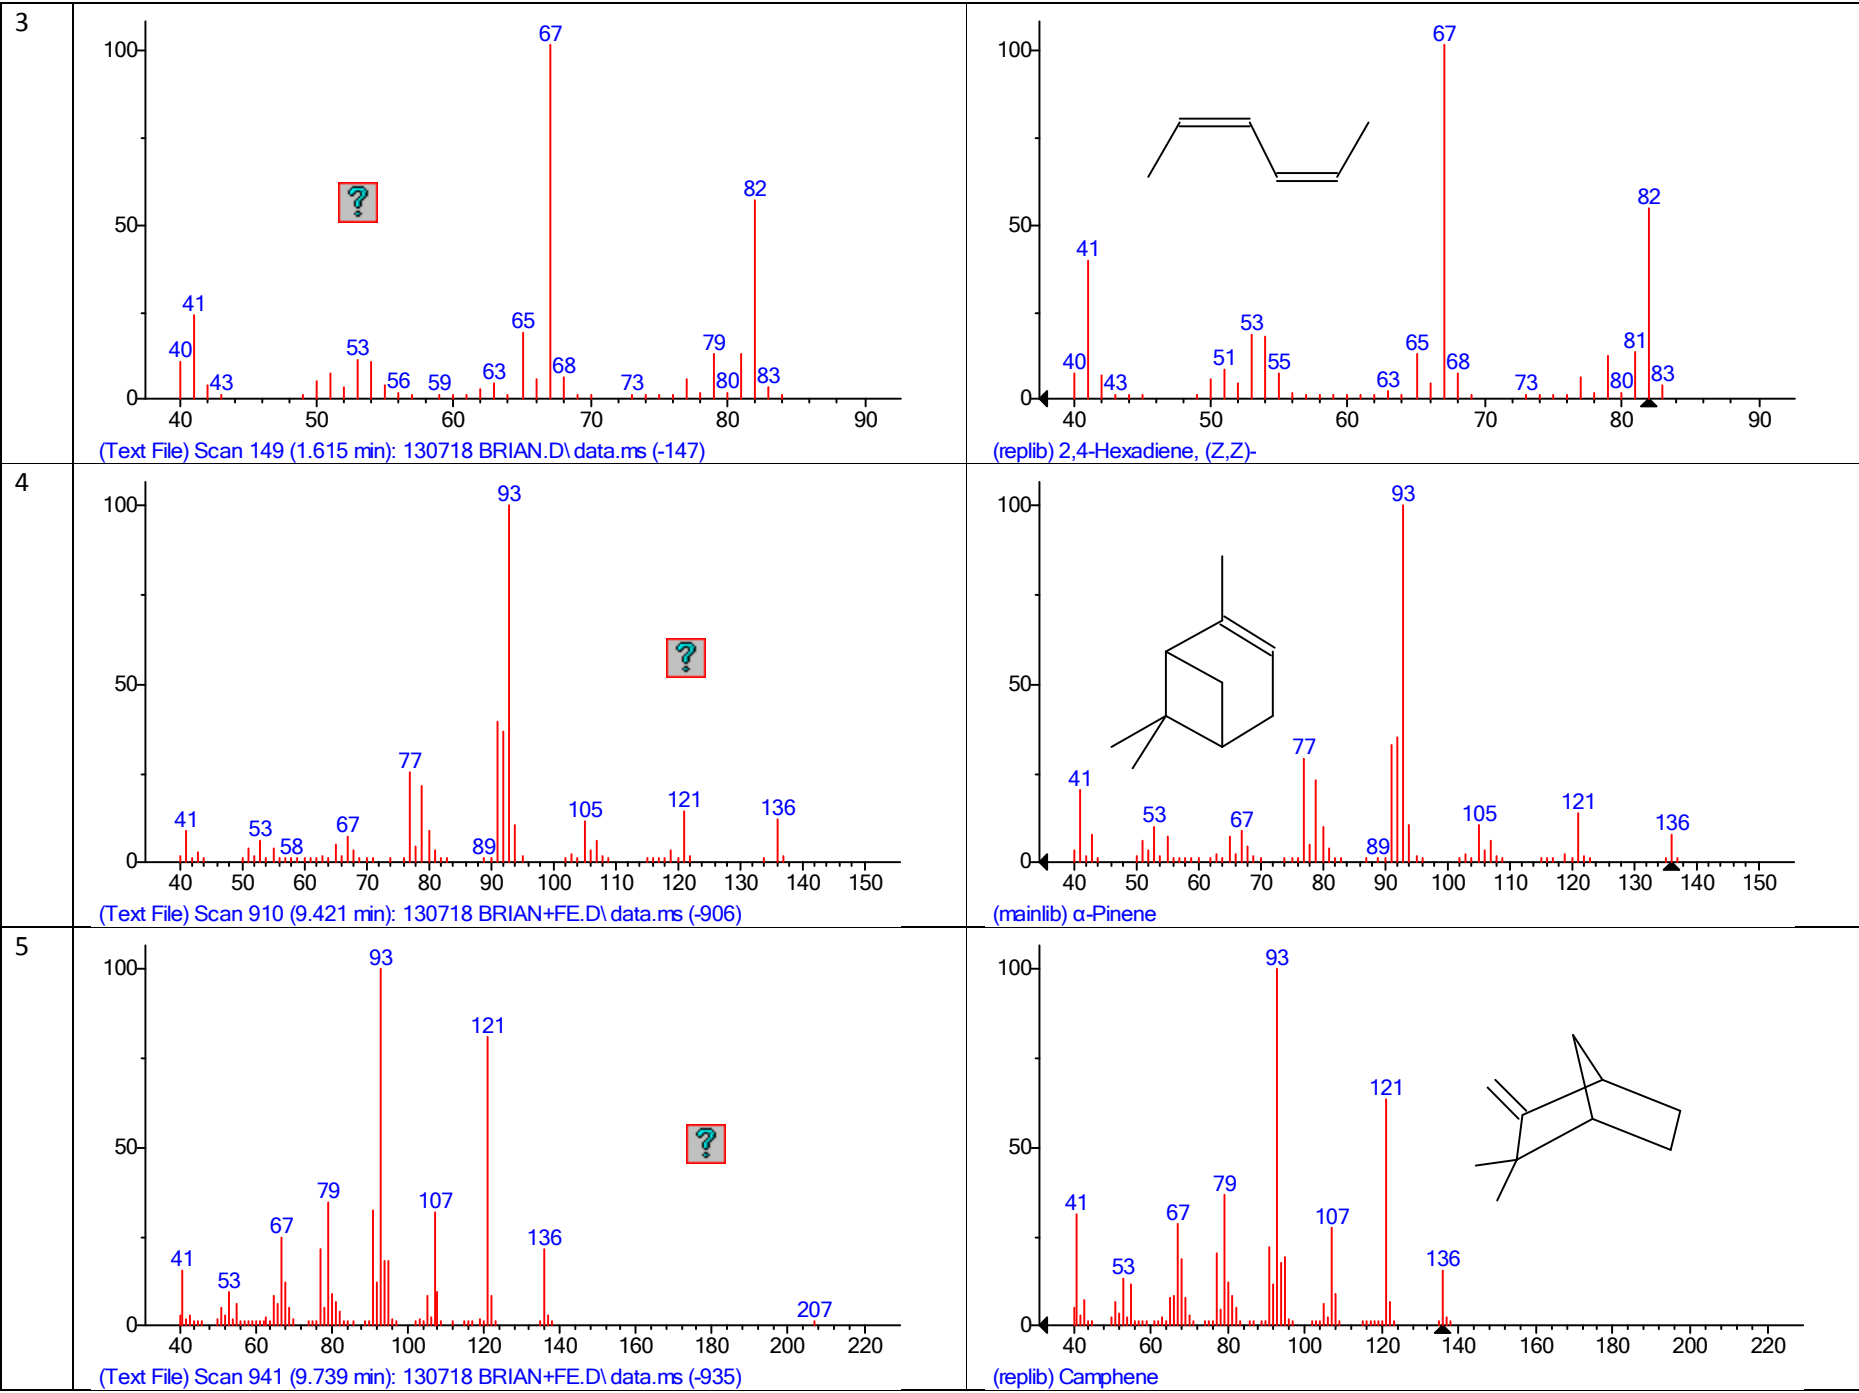

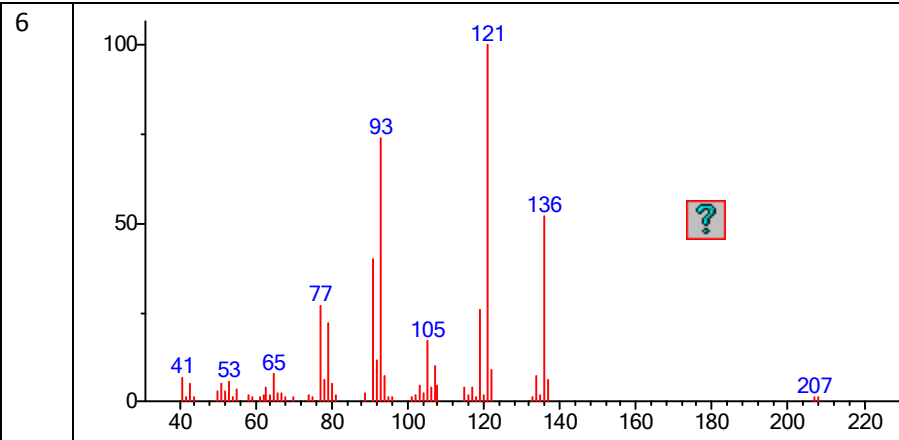

(Text File) Scan 1077 (11.134 min): 130718 BRIAN+FE.D\data.ms (-1073)

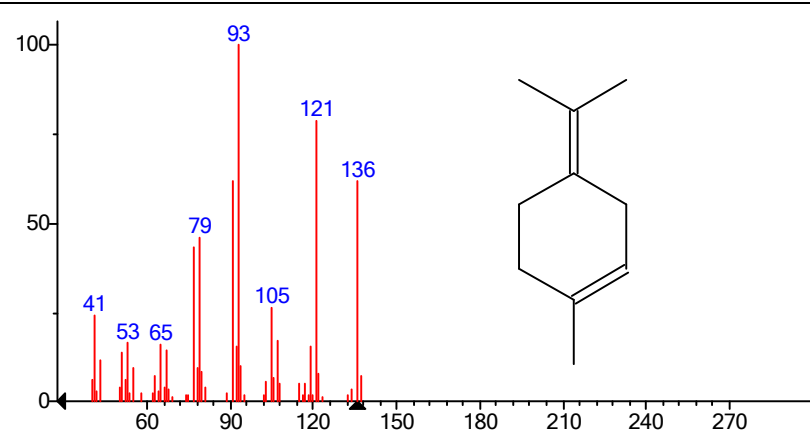

(mainlib) Cyclohexene, 1-methyl-4-(1-methylethylidene)-

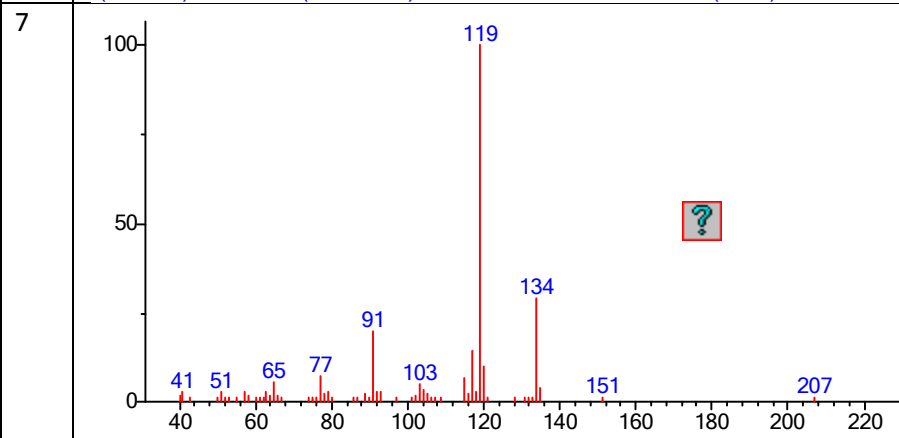

(Text File) Scan 1092 (11.287 min): 130718 BRIAN+FE.D\data.ms (-1089)

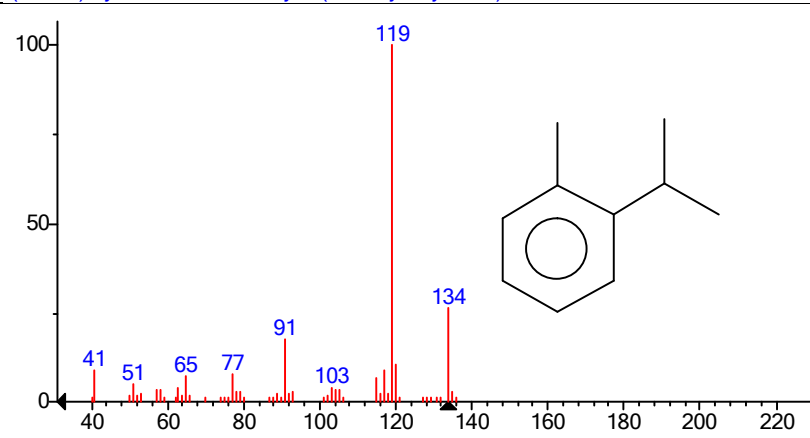

(replib) Benzene, 1-methyl-2-(1-methylethyl)-

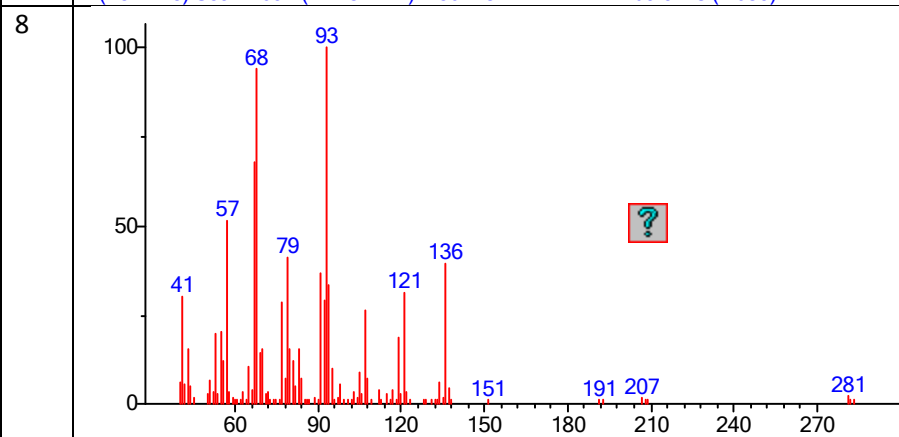

(Text File) Scan 1100 (11.369 min): 130718 BRIAN+FE.D\data.ms

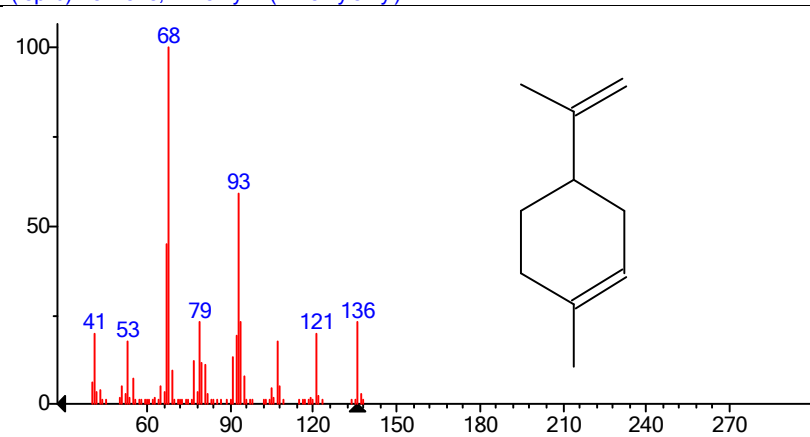

(mainlib) D-Limonene

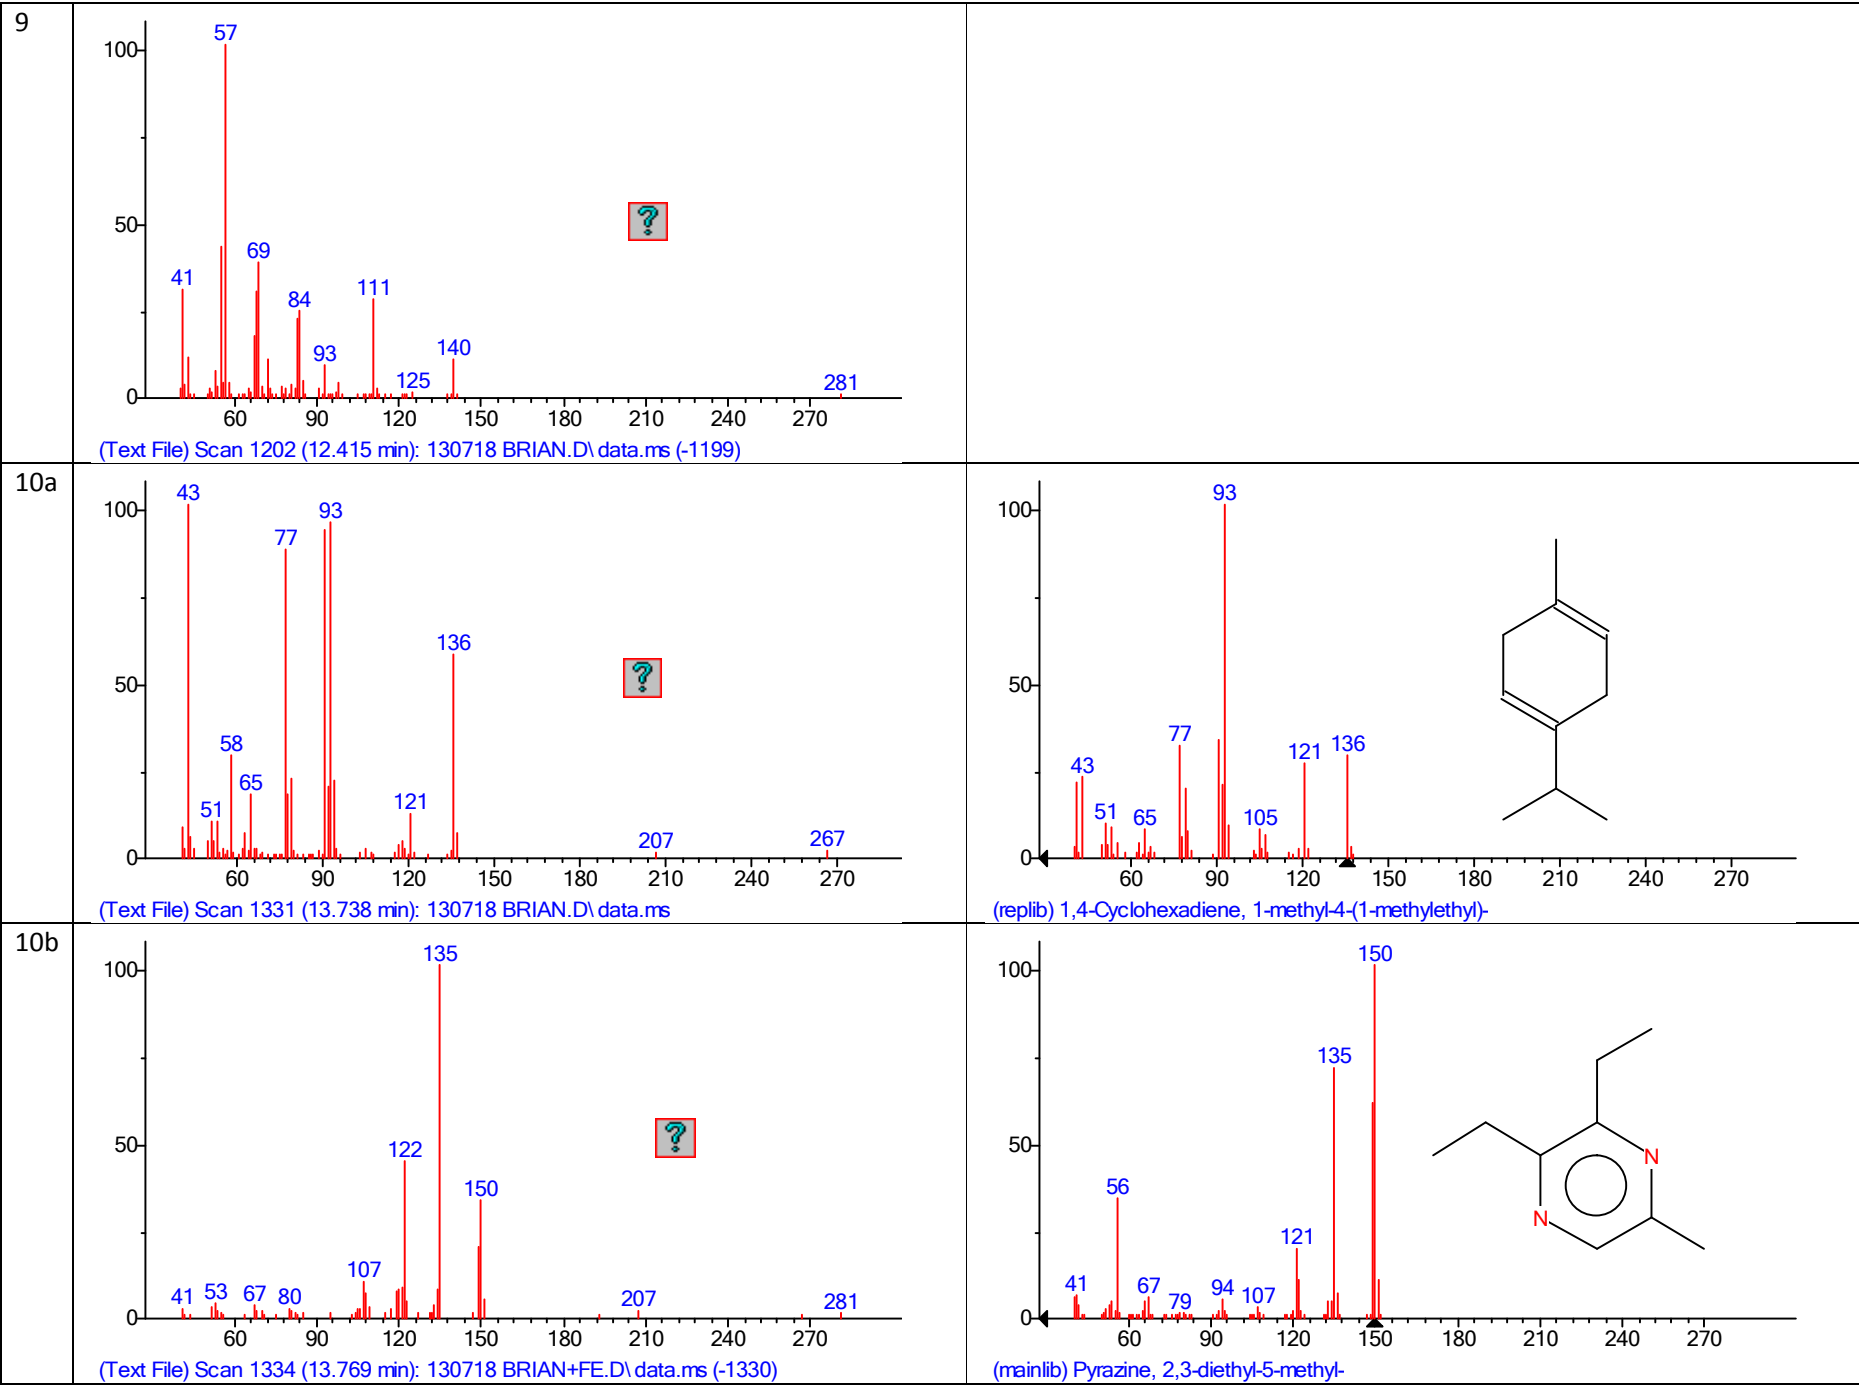

11

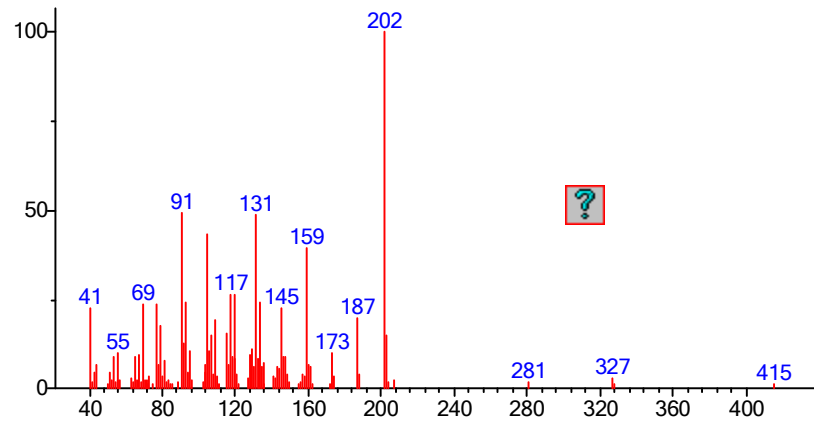

(Text File) Scan 2119 (21.821 min): 130718 BRIAN+FE.D\data.ms

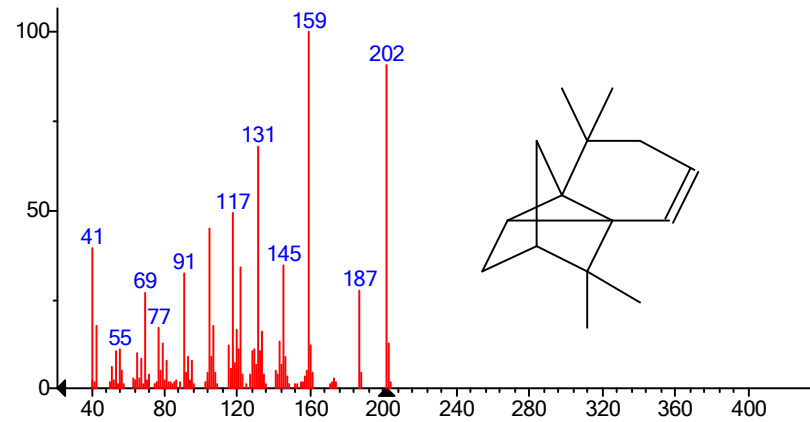

(mainlib) Cycloisolongifolene, 8,9-dehydro-

12

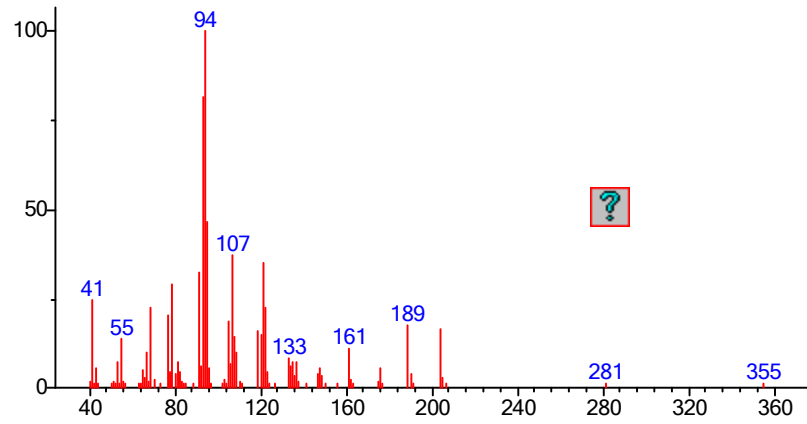

(Text File) Scan 2161 (22.251 min): 130718 BRIAN+FE.D\data.ms (-2166)

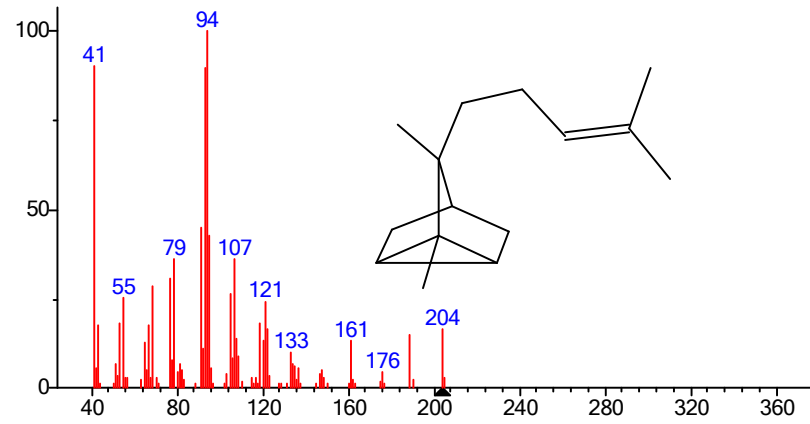

(replib) Tricyclo[2.2.1.0(2,6)]heptane, 1,7-dimethyl-7-(4-methyl-3-pentenyl)-, (-)

13

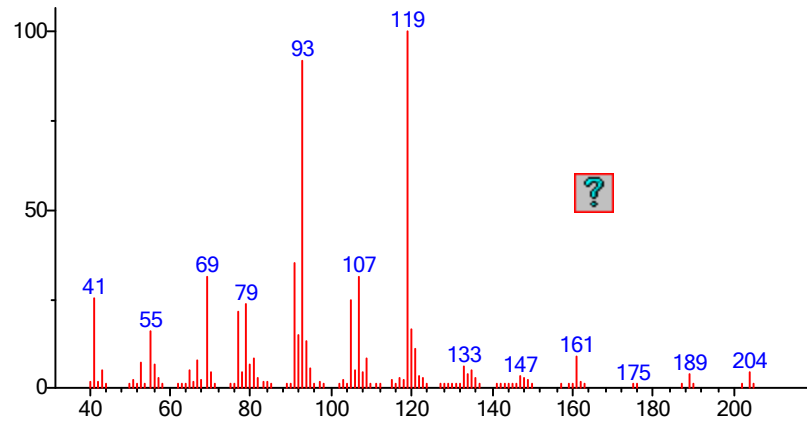

(Text File) Scan 2215 (22.805 min): 130718 BRIAN+FE.D\data.ms

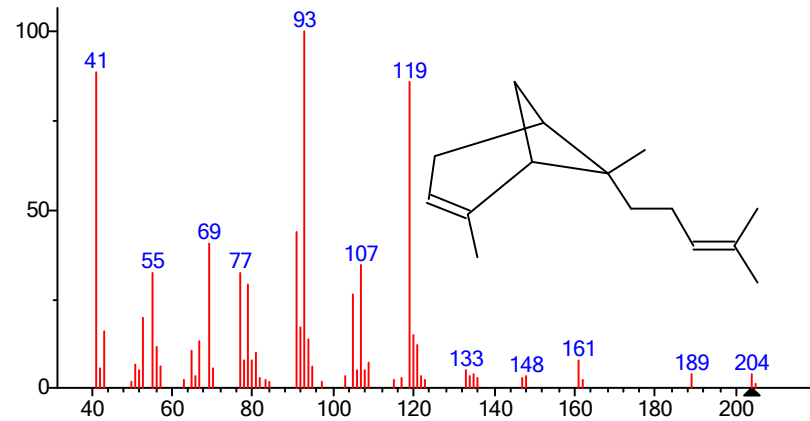

(mainlib) Bicyclo[3.1.1]hept-2-ene, 2,6-dimethyl-6-(4-methyl-3-pentenyl)-

14

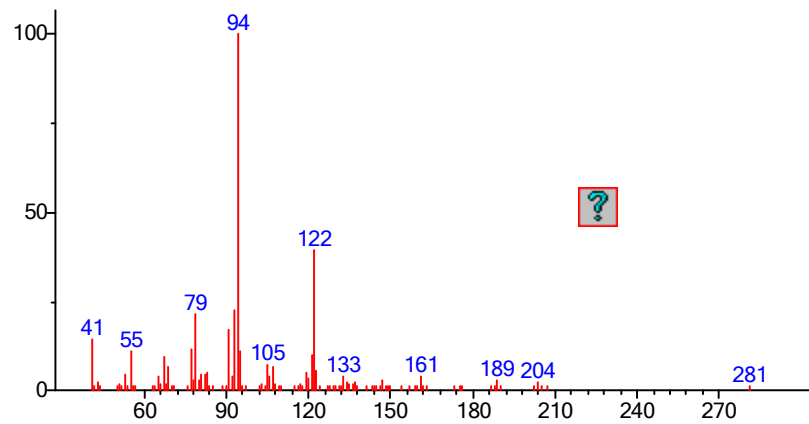

(Text File) Scan 2298 (23.657 min): 130718 BRIAN+FE.D\data.ms

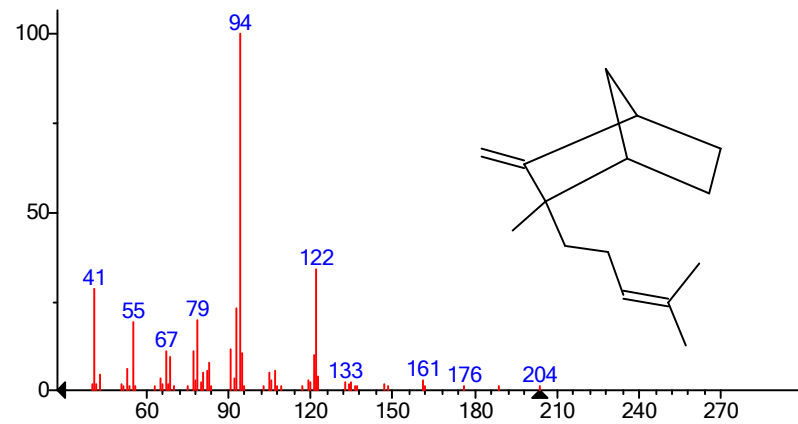

(replib) Bicyclo[2.2.1]heptane, 2-methyl-3-methylene-2-(4-methyl-3-pentenyl)-, (1S-exo)-

15

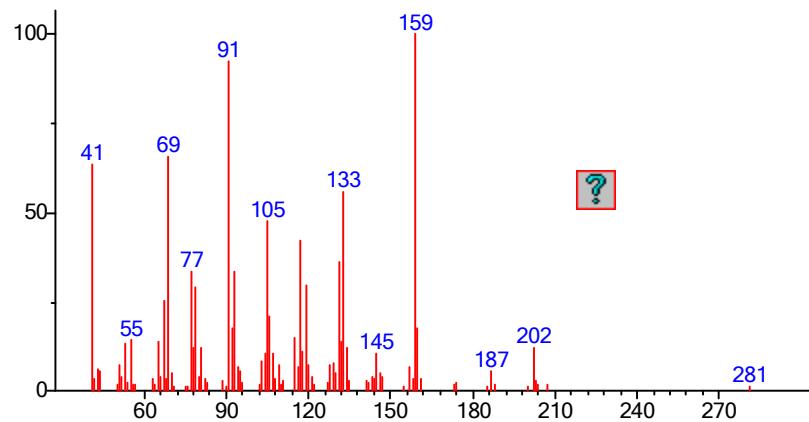

(Text File) Scan 2312 (23.800 min): 130718 BRIAN+FE.D\data.ms

16

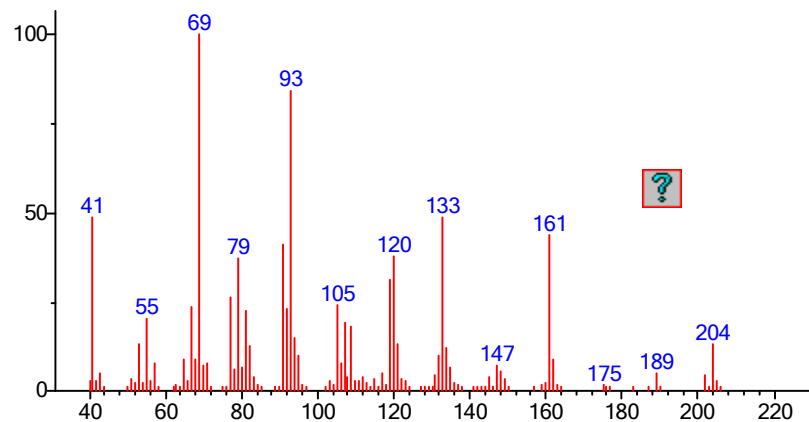

(Text File) Scan 2384 (24.539 min): 130718 BRIAN+FE.D\data.ms

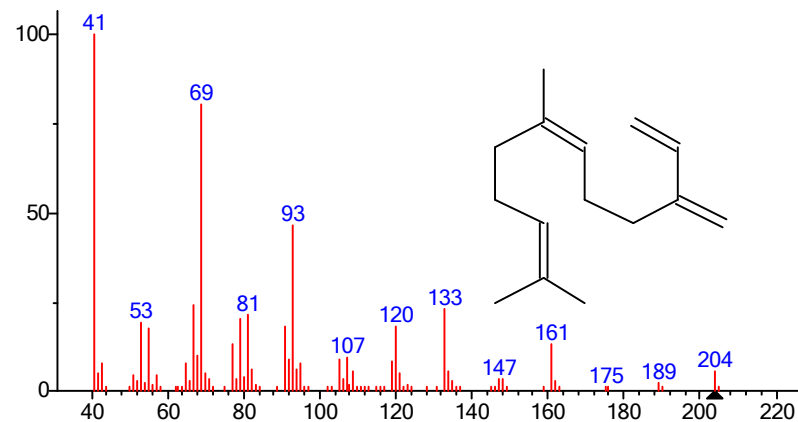

(mainlib) 1,6,10-Dodecatriene, 7,11-dimethyl-3-methylene-, (Z)-

17

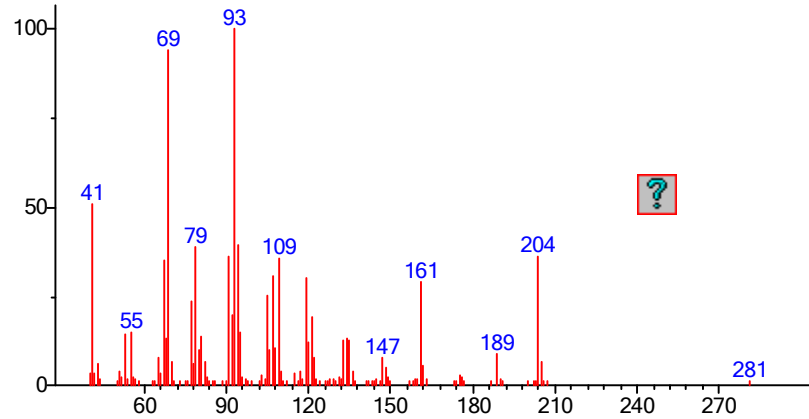

(Text File) Scan 2464 (25.359 min): 130718 BRIAN+FE.D\data.ms

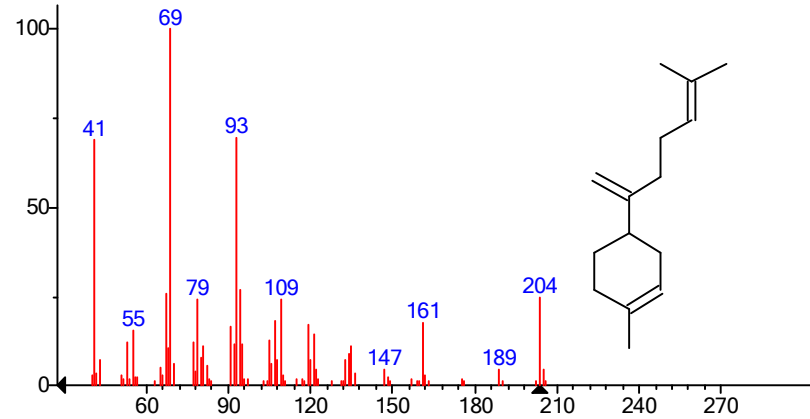

(mainlib) Cyclohexene, 1-methyl-4-(5-methyl-1-methylene-4-hexenyl)-, (S)-

18a

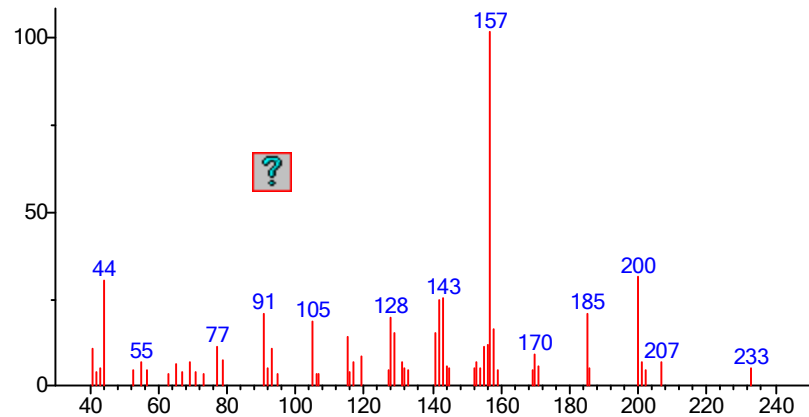

(Text File) Scan 2888 (29.708 min): 130718 BRIAN.D\data.ms

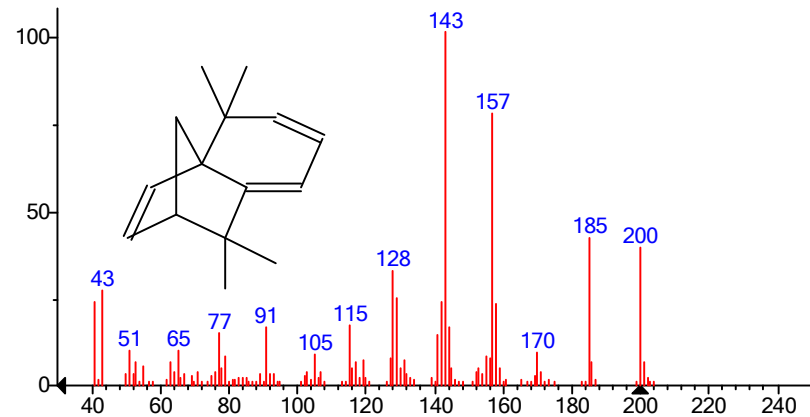

(mainlib) Isolongifolene, 4,5,9,10-dehydro-

18b

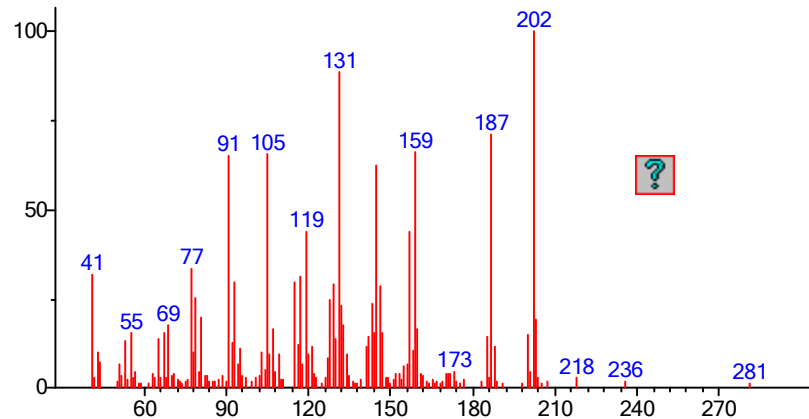

(Text File) Scan 2890 (29.728 min): 130718 BRIAN+FE.D\data.ms

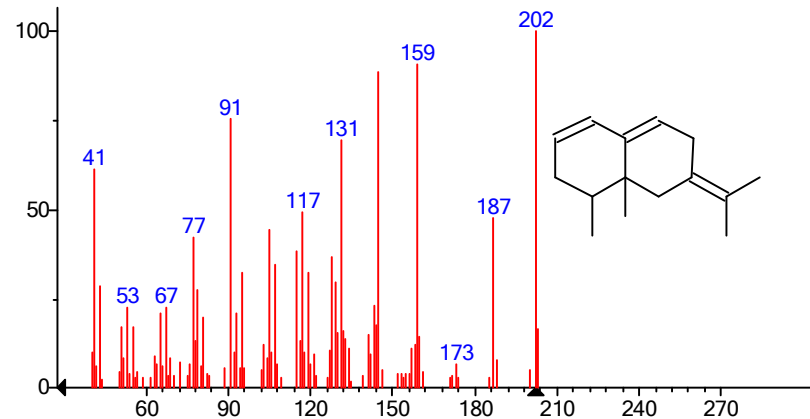(mainlib)  $\beta$ -Vatirene

19

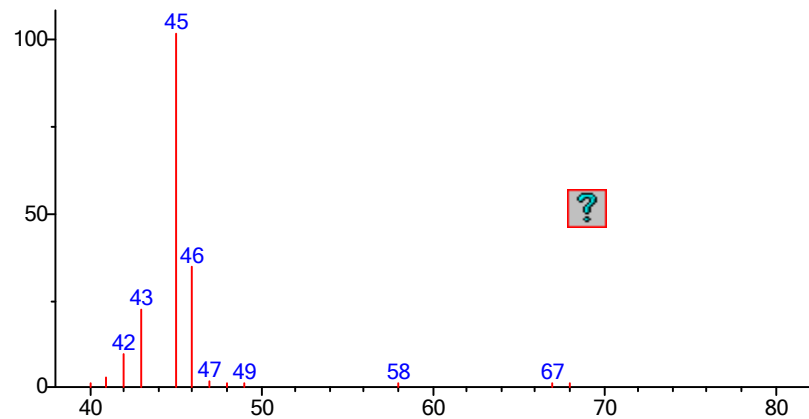

(Text File) Scan 78 (0.887 min): 130718 BRIAN+FE.D\data.ms (-76)

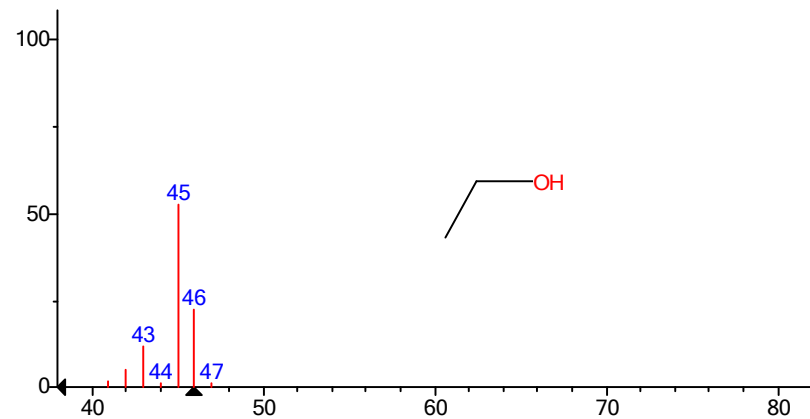

(mainlib) Ethanol

20

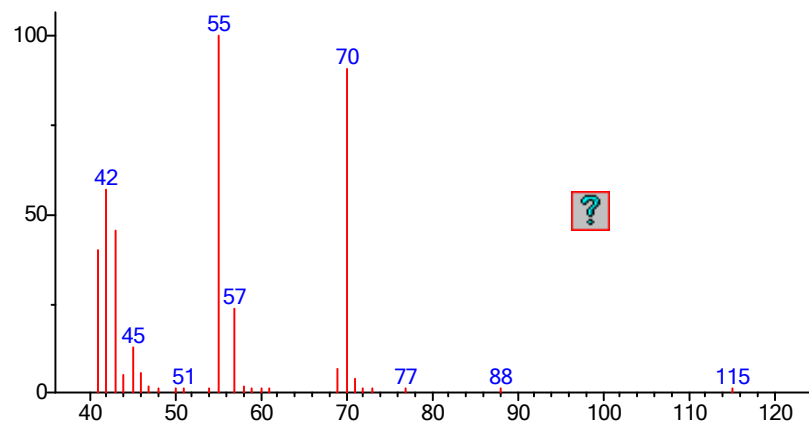

(Text File) Scan 307 (3.236 min): ALEN625.D\data.ms (-298)

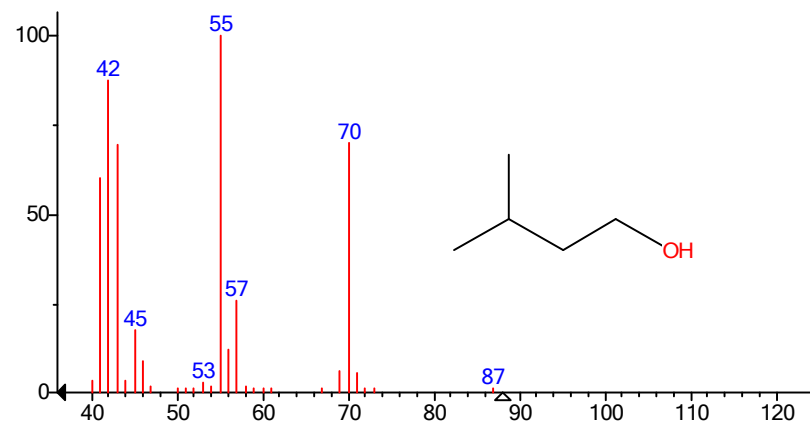

(replib) 1-Butanol, 3-methyl-

21

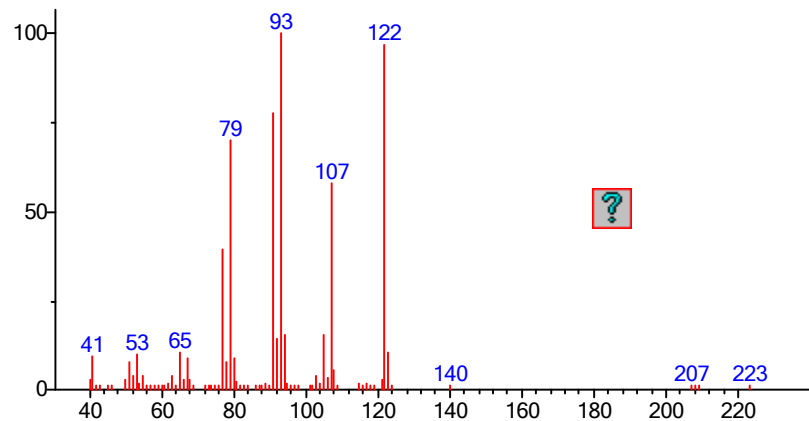

(Text File) Scan 1011 (10.457 min): 130718 BRIAN+FE.D\data.ms (-1005)

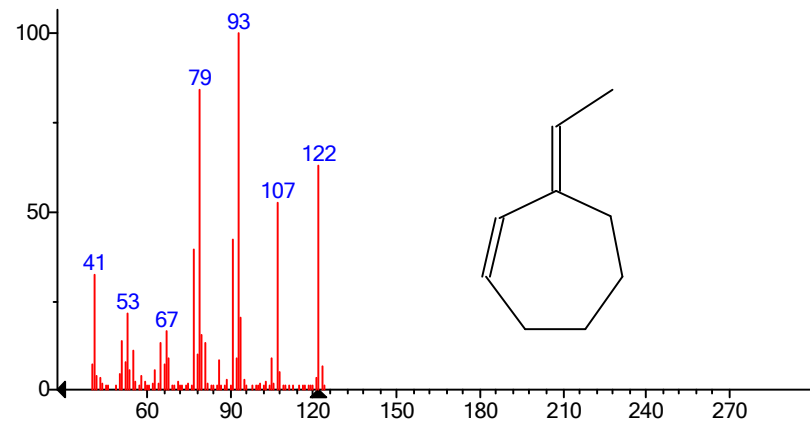

(mainlib) 3-Ethylidenecycloheptene



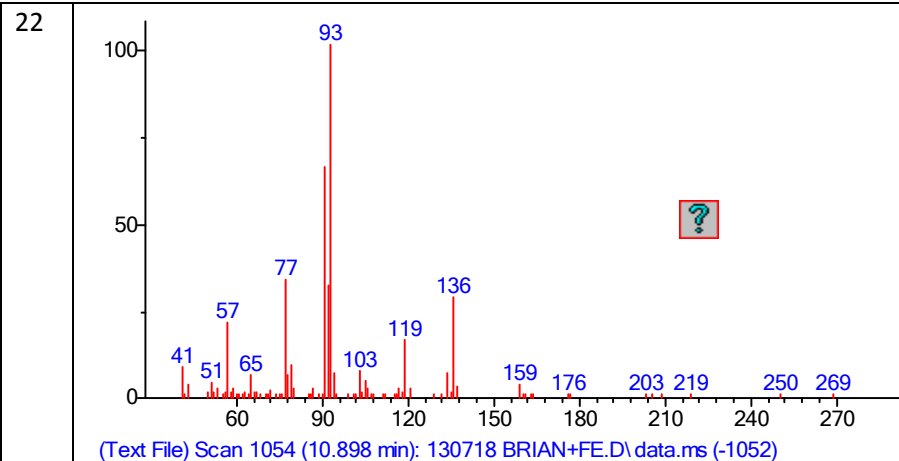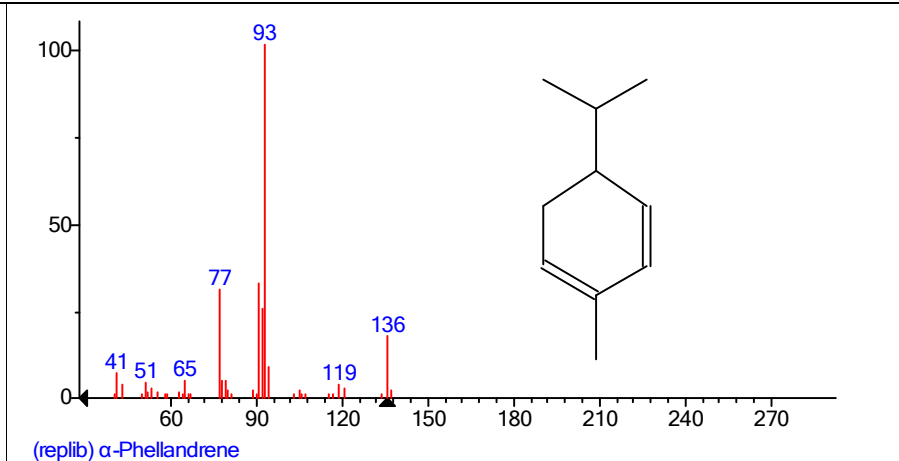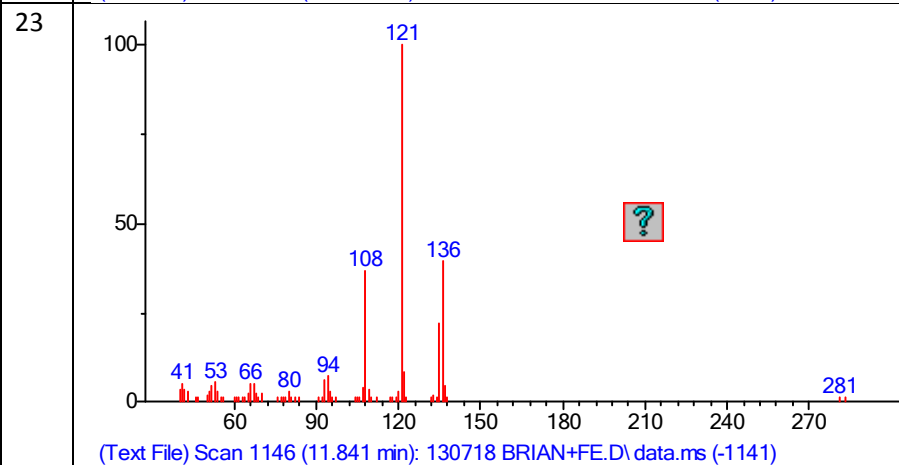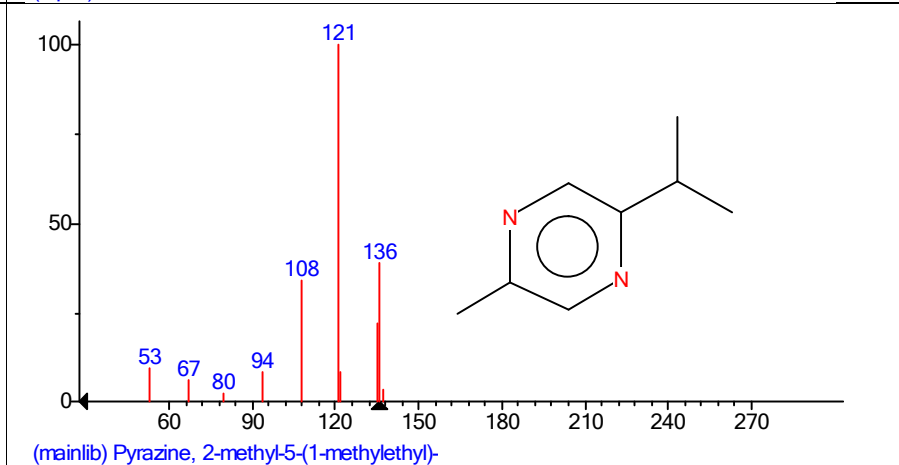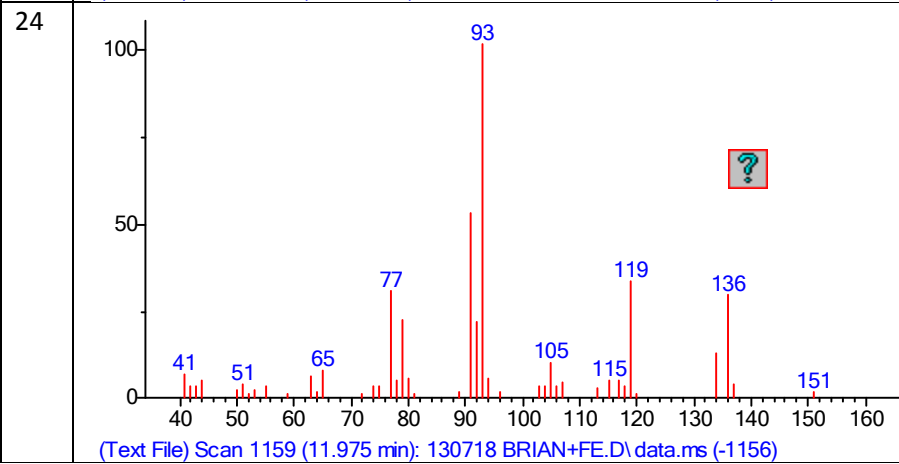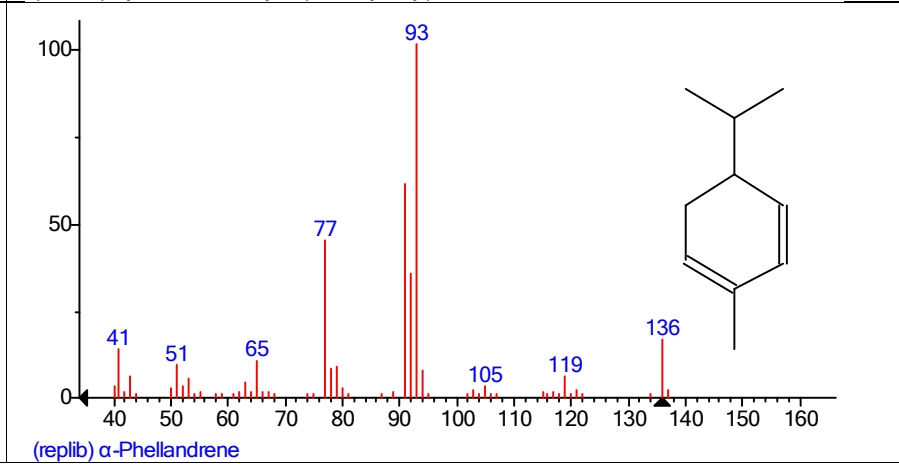

25a

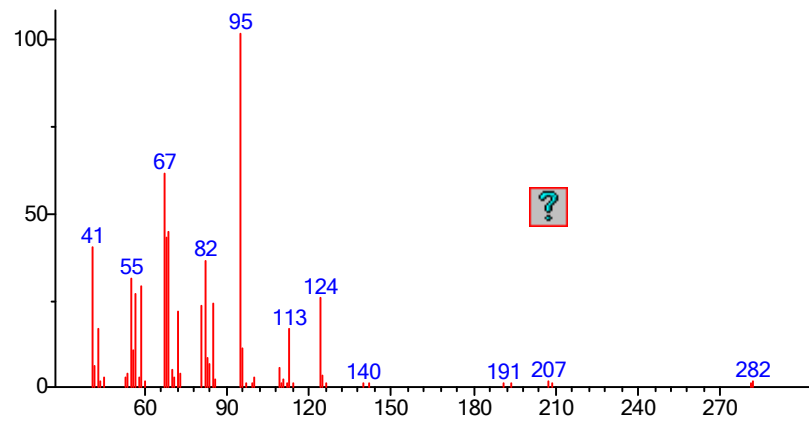

(Text File) Scan 1218 (12.580 min): 130718 BRIAN+FE.D\data.ms (-1220)

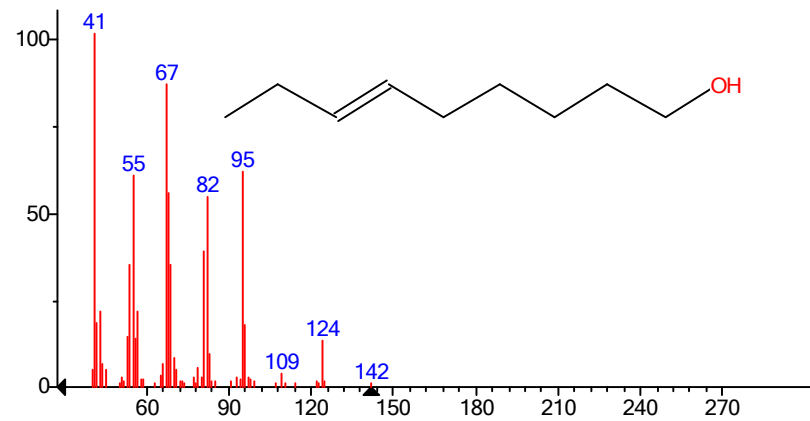

(mainlib) 6-Nonen-1-ol, (E)-

25b

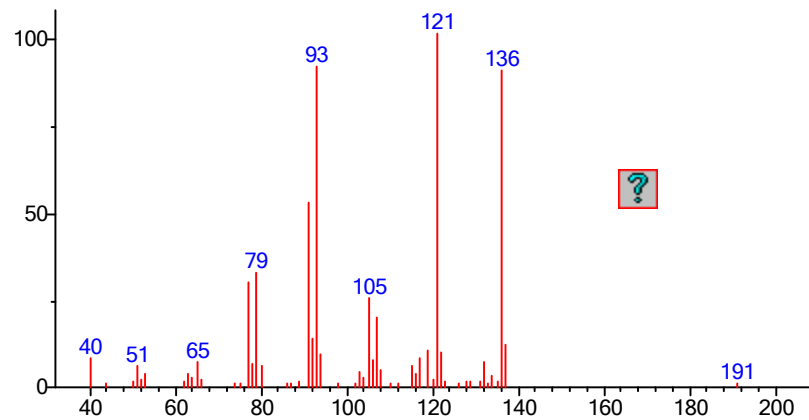

(Text File) Scan 1220 (12.600 min): 130718 BRIAN+FE.D\data.ms (-1217)

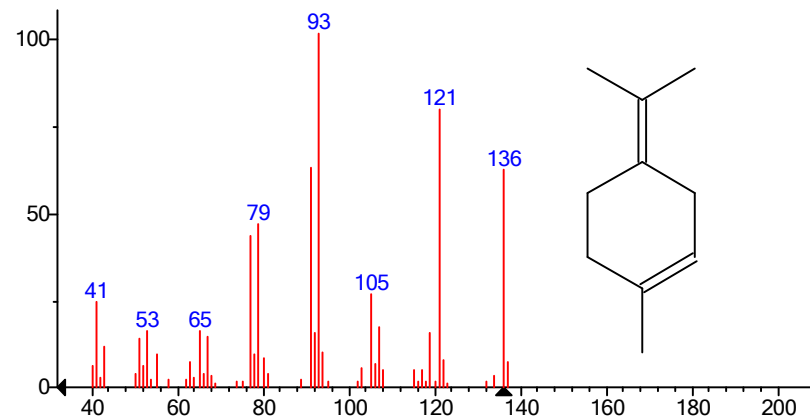

(mainlib) Cyclohexene, 1-methyl-4-(1-methylethylidene)-

26

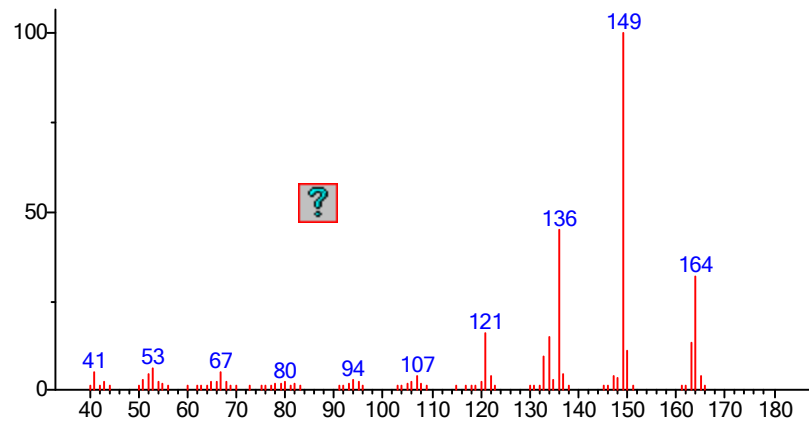

(Text File) Scan 1451 (14.970 min): 130906 BRIAN+FE PLUG.D\data.ms

27

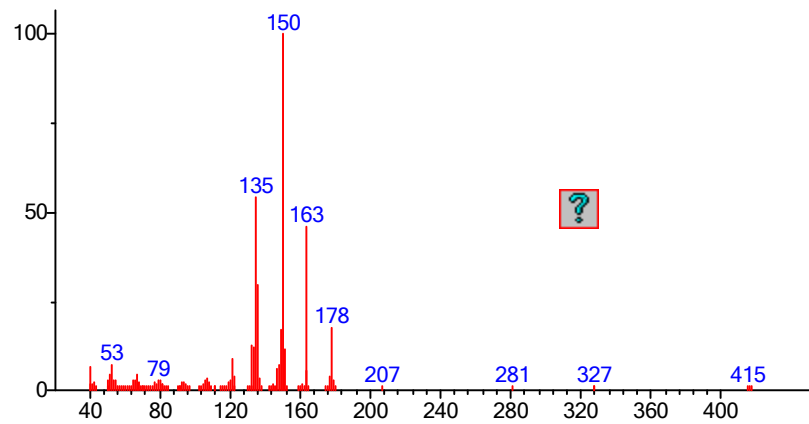

(Text File) Scan 1678 (17.298 min): 130906 BRIAN+FE PLUG.D\data.ms

28

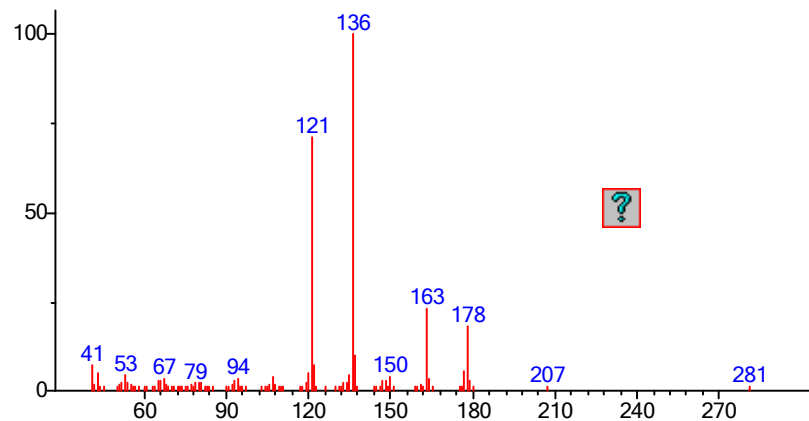

(Text File) Scan 1694 (17.462 min): 130906 BRIAN+FE PLUG.D\data.ms

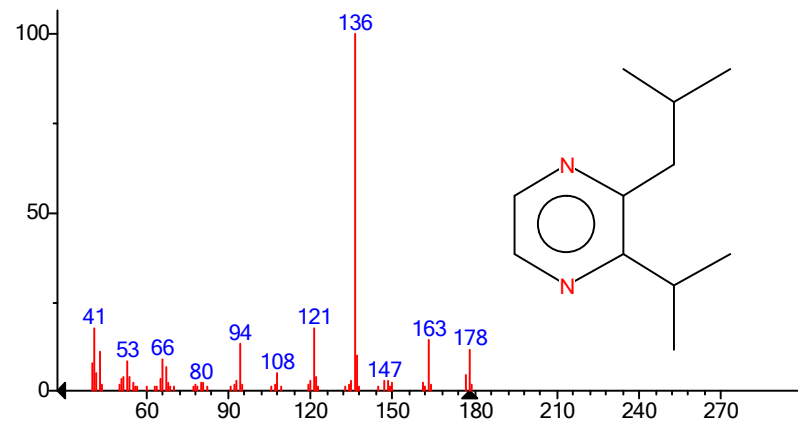

(mainlib) 2-(2-Methylpropyl)-3-(1-methylethyl)pyrazine

29

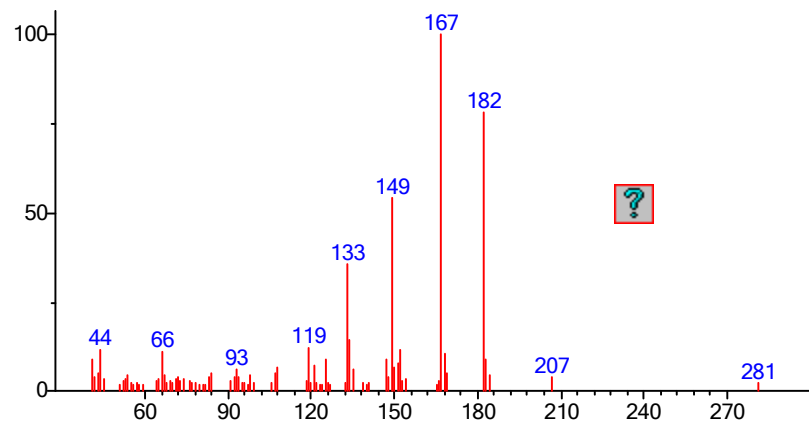

(Text File) Scan 1973 (20.323 min): 130718 BRIAN+FE.D\data.ms

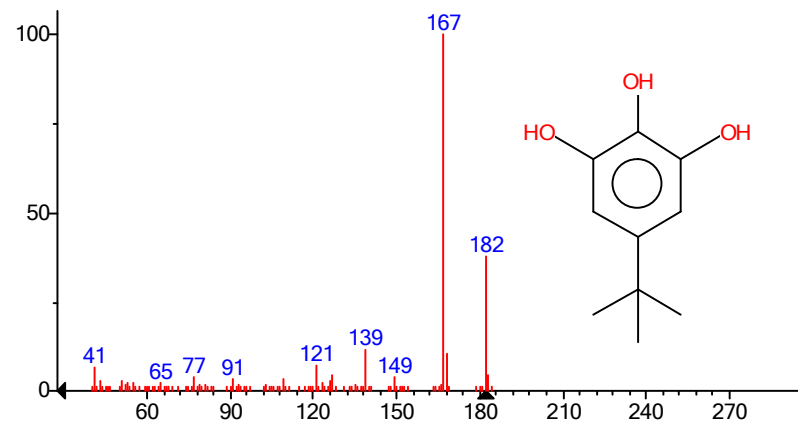

(mainlib) 5-tert-Butylpyrogallol

30

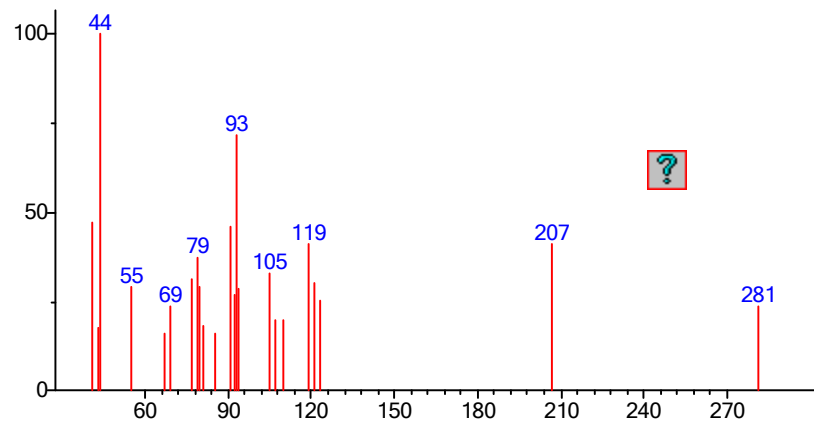

(Text File) Scan 1992 (20.518 min): 130718 BRIAN+FE.D\data.ms

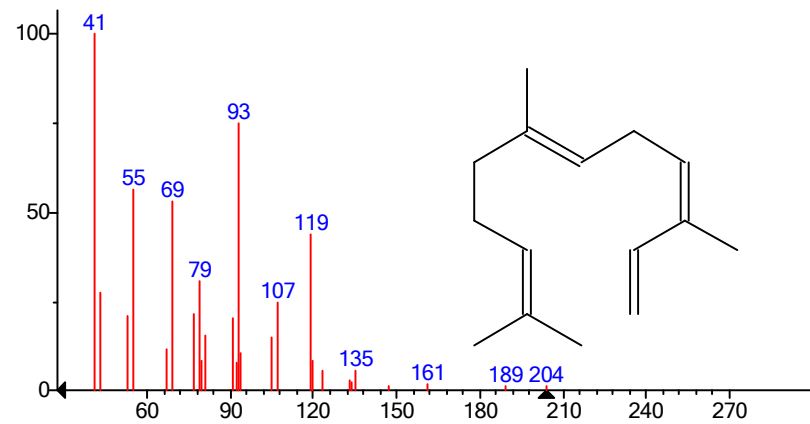

(replib) 1,3,6,10-Dodecatetraene, 3,7,11-trimethyl-, (Z,E)-

31

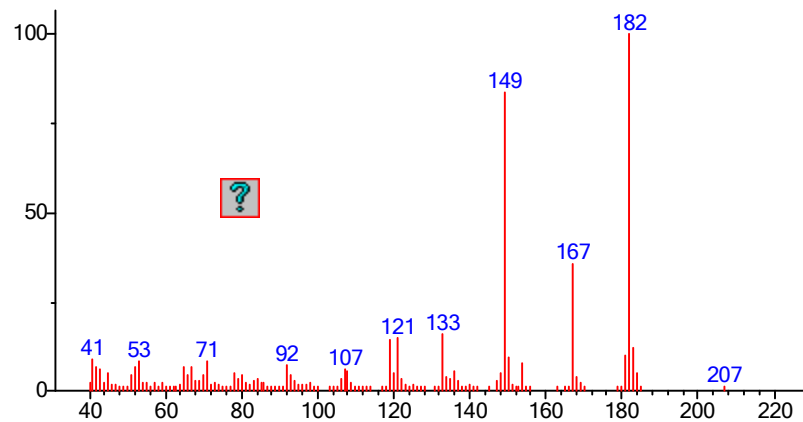

(Text File) Scan 2010 (20.703 min): 130906 BRIAN+FE PLUG.D\data.ms

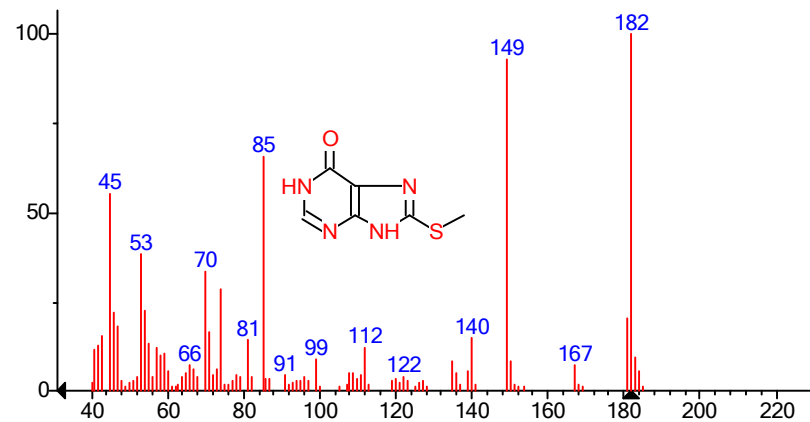

(mainlib) Purin-6(1H)-one, 8-methylthio-

32

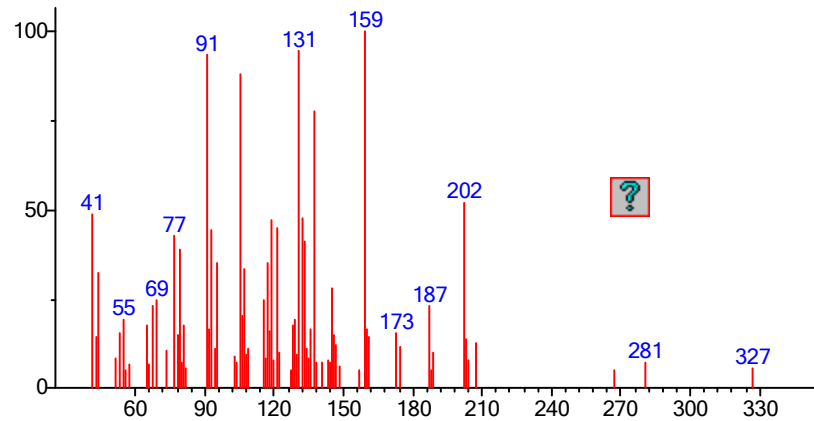

(Text File) Scan 2081 (21.431 min): 130718 BRIAN+FE.D\data.ms

33

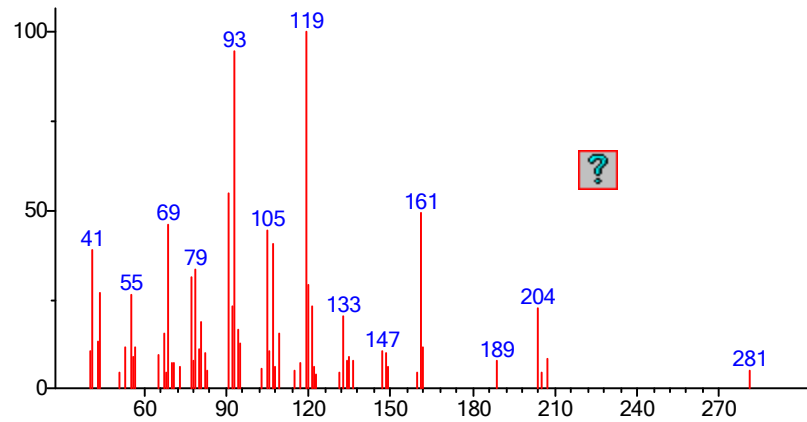

(Text File) Scan 2145 (22.087 min): 130718 BRIAN+FE.D\data.ms

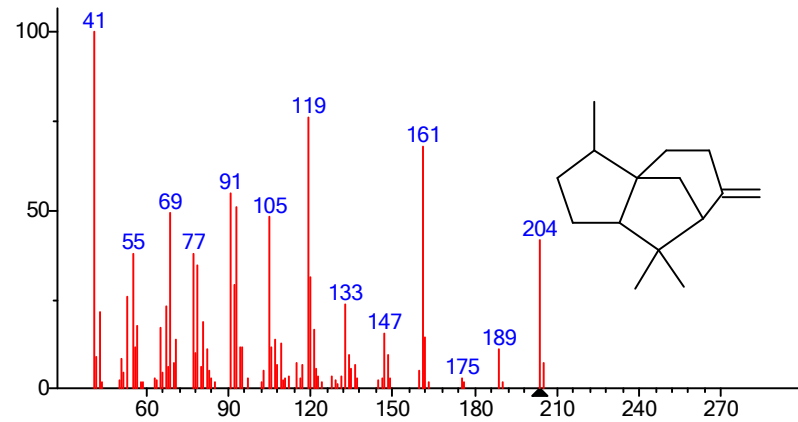

(mainlib) Cedrene

34

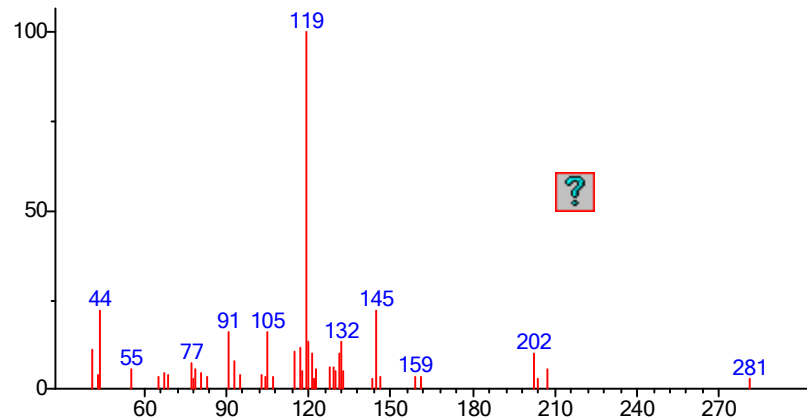

(Text File) Scan 2195 (22.600 min): 130718 BRIAN+FE.D\data.ms

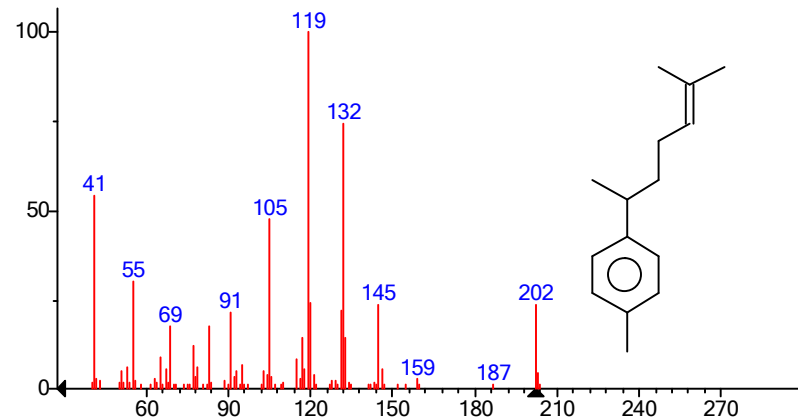

(mainlib) Benzene, 1-(1,5-dimethyl-4-hexenyl)-4-methyl-

35

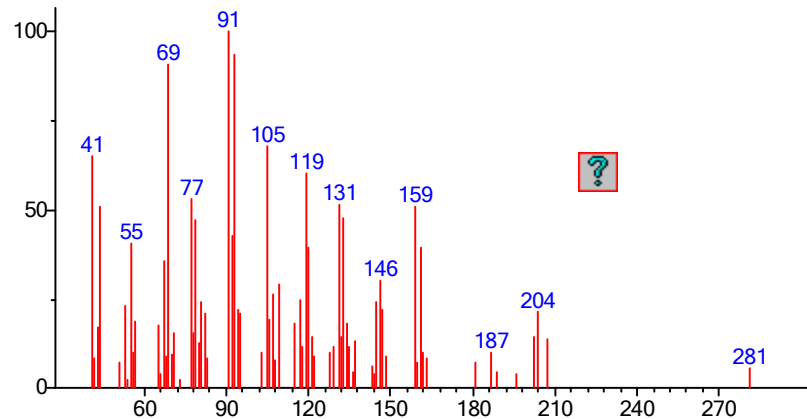

(Text File) Average of 23.031 to 23.062 min.: 130718 BRIAN+FE.D\data.ms

36a

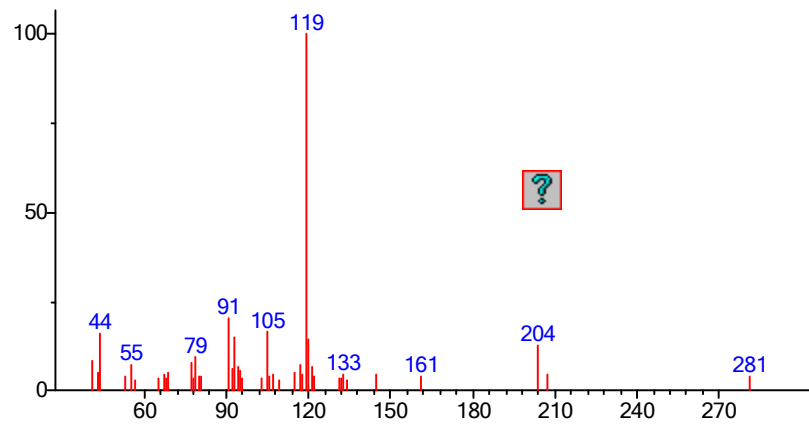

(Text File) Scan 2248 (23.144 min): 130718 BRIAN+FE.D\data.ms

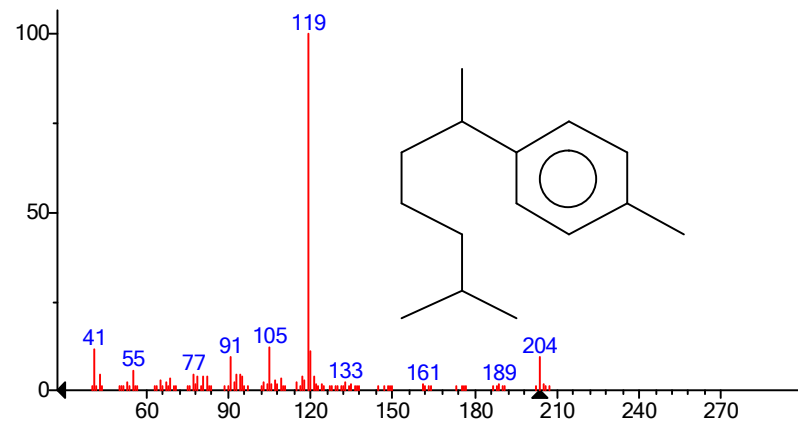

(mainlib) Benzene, 1-(1,5-dimethylhexyl)-4-methyl-

36b

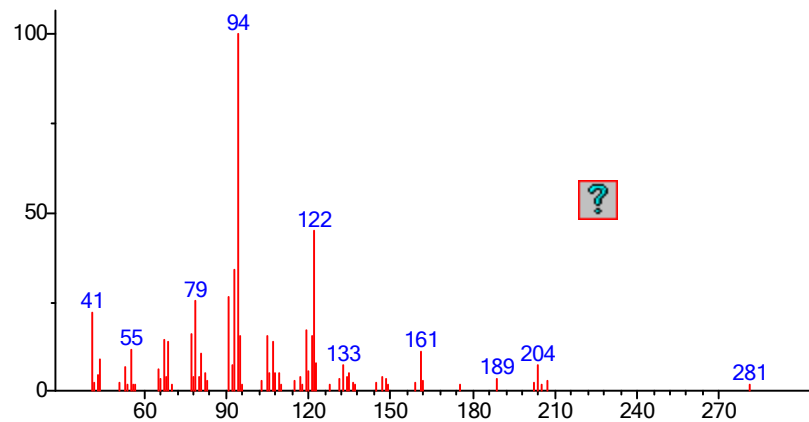

(Text File) Scan 2256 (23.226 min): 130718 BRIAN+FE.D\data.ms

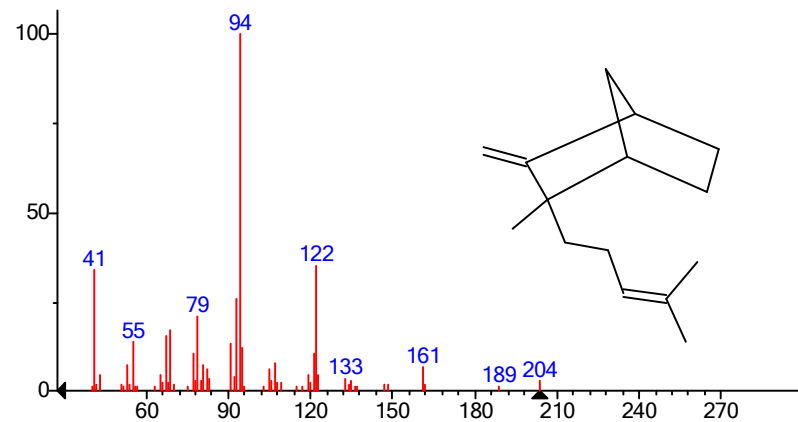

(replib) Bicyclo[2.2.1]heptane, 2-methyl-3-methylene-2-(4-methyl-3-pentenyl)-, (1S-endo)-

37

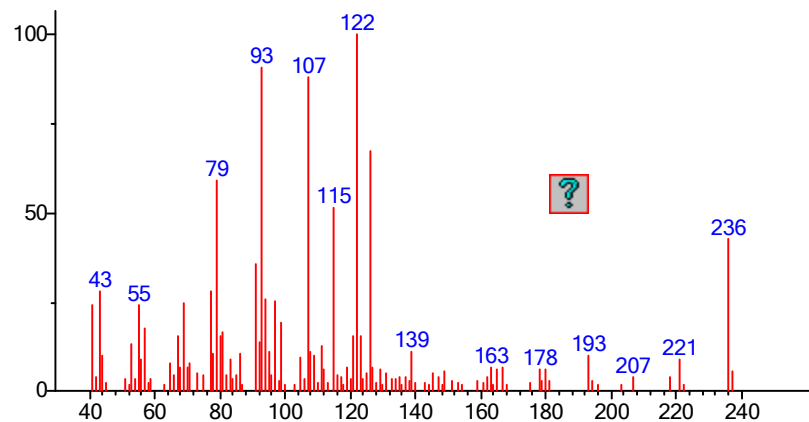

(Text File) Scan 2274 (23.410 min): 130718 BRIAN+FE.D\data.ms

38

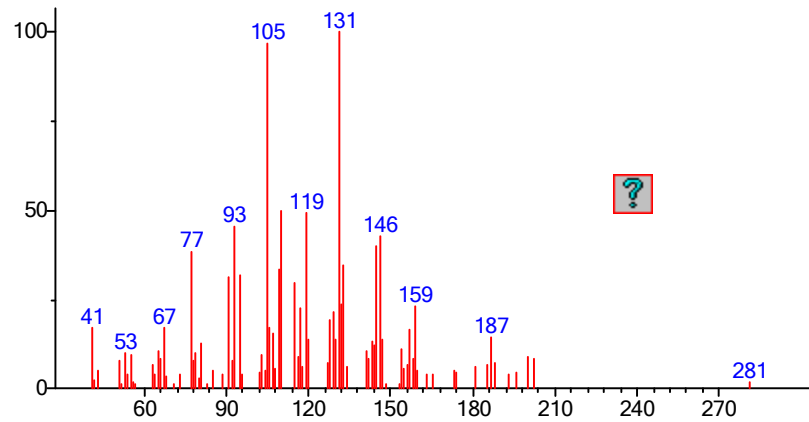

(Text File) Scan 2288 (23.554 min): 130718 BRIAN+FE.D\data.ms (-2292)

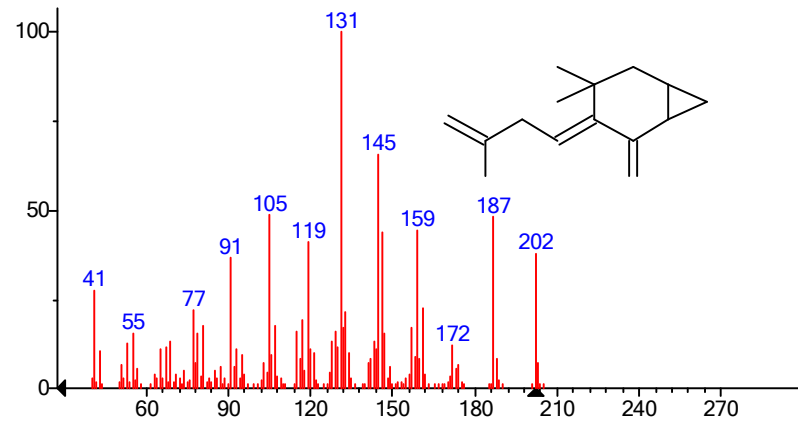

(mainlib) 4,4-Dimethyl-3-(3-methylbut-3-enylidene)-2-methylenebicyclo[4.1.0]heptane

39

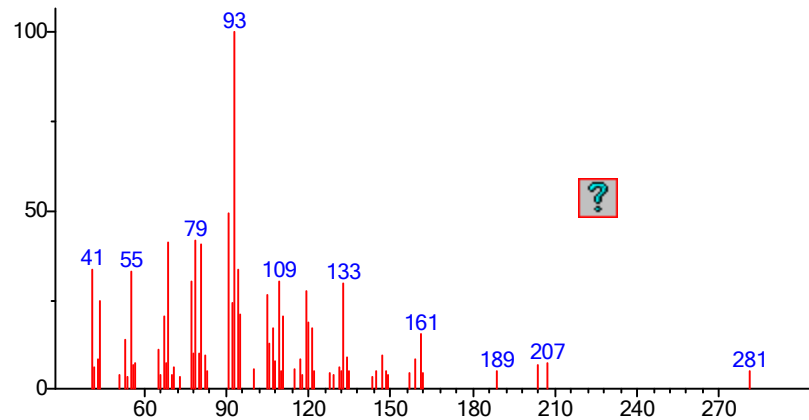

(Text File) Scan 2326 (23.944 min): 130718 BRIAN+FE.D\data.ms

40

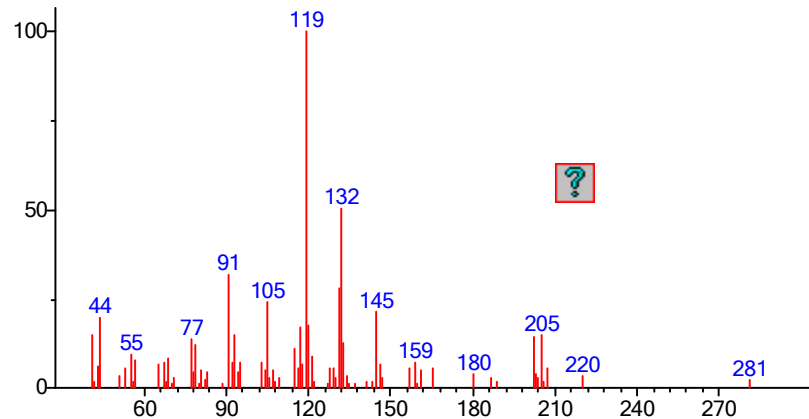

(Text File) Average of 24.016 to 24.046 min.: 130718 BRIAN+FE.D\data.ms

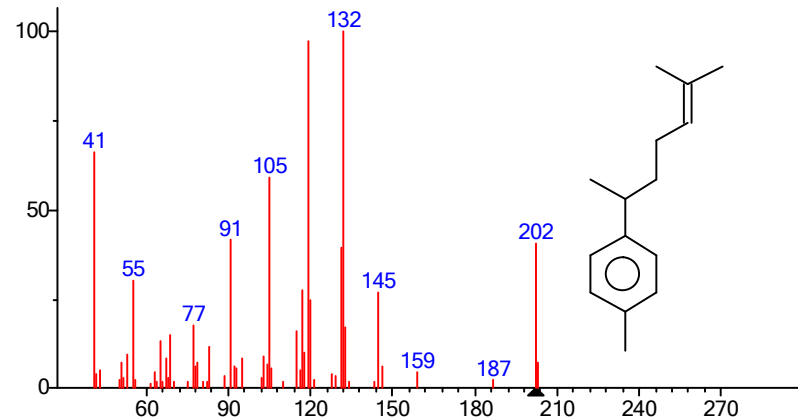

(replib) Benzene, 1-(1,5-dimethyl-4-hexenyl)-4-methyl-

41

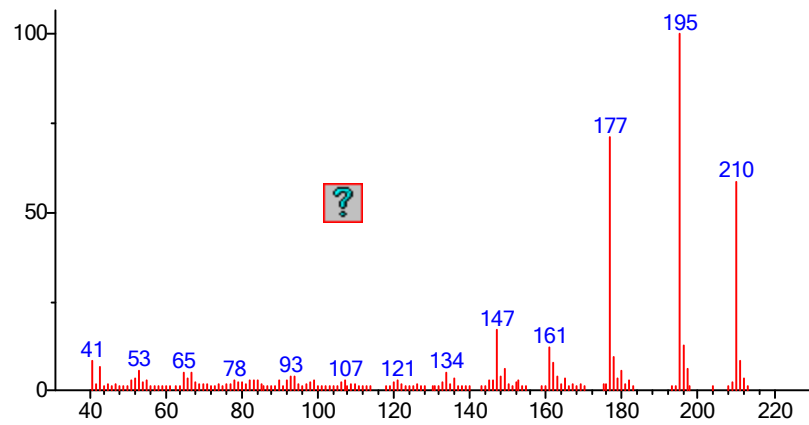

(Text File) Scan 2364 (24.334 min): 130906 BRIAN+FE PLUG.D\data.ms (-2370)

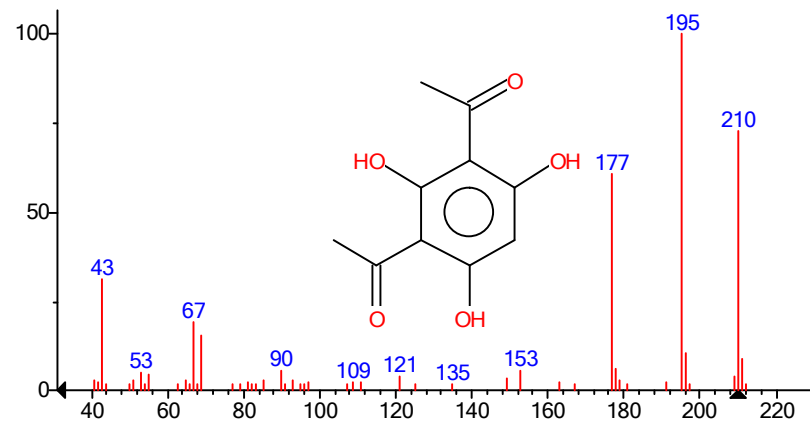

(mainlib) Ethanone, 1,1'-(2,4,6-trihydroxy-1,3-phenylene)bis-

42

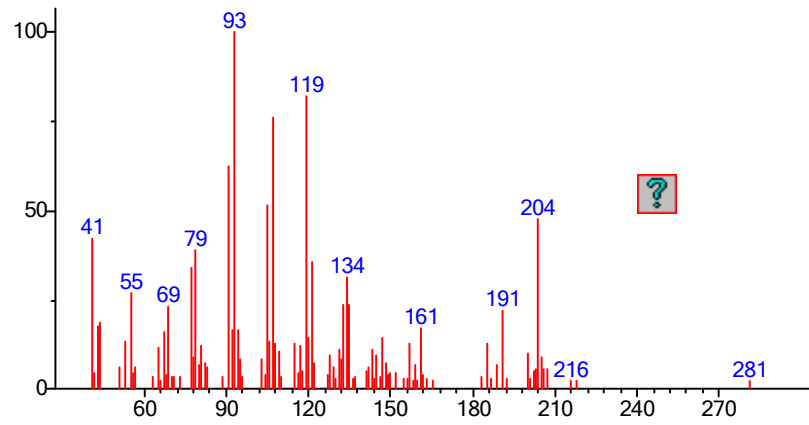

(Text File) Scan 2489 (25.616 min): 130718 BRIAN+FE.D\data.ms

43

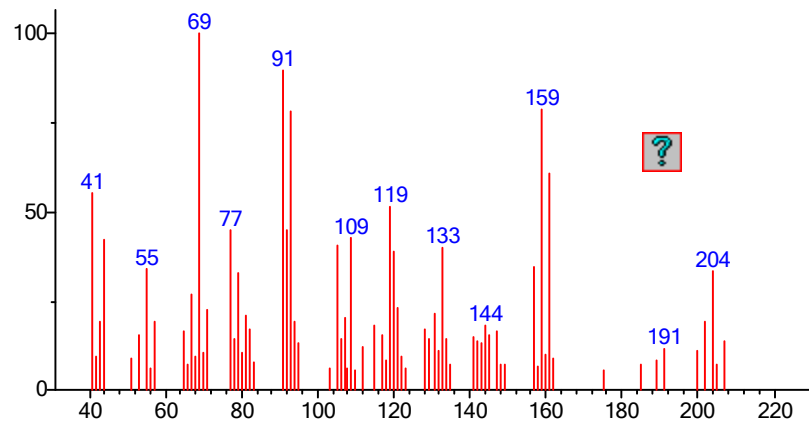

(Text File) Scan 2517 (25.903 min): 130718 BRIAN+FE.D\data.ms



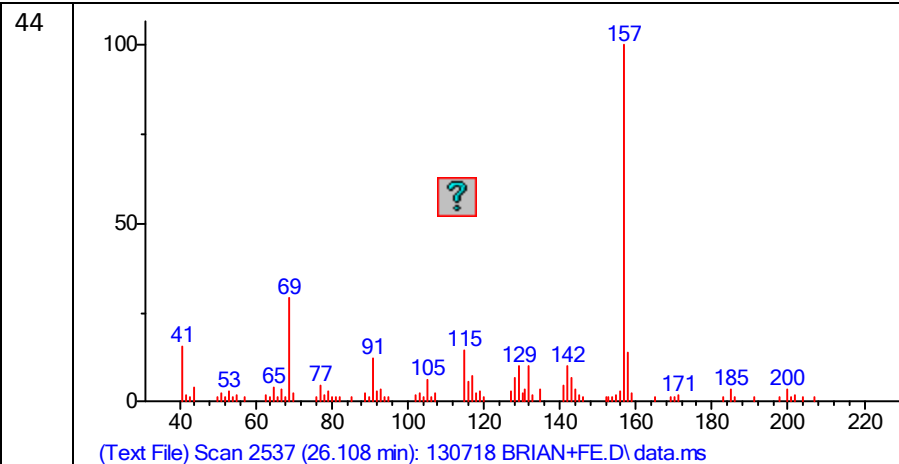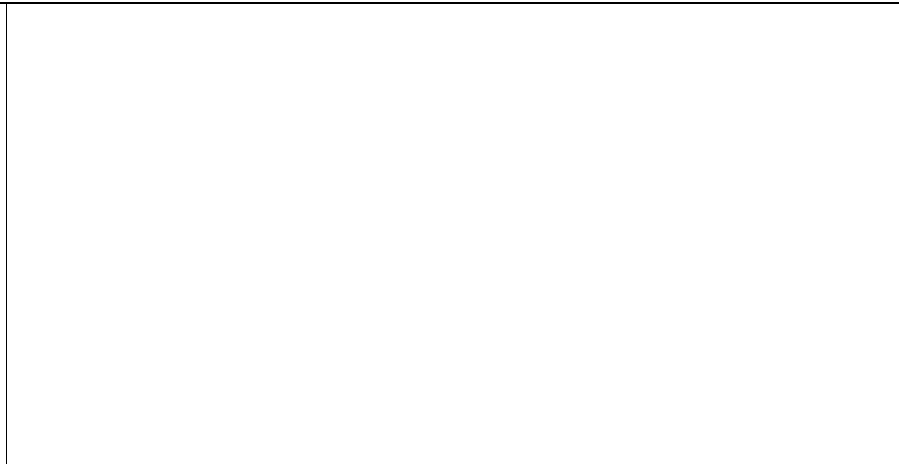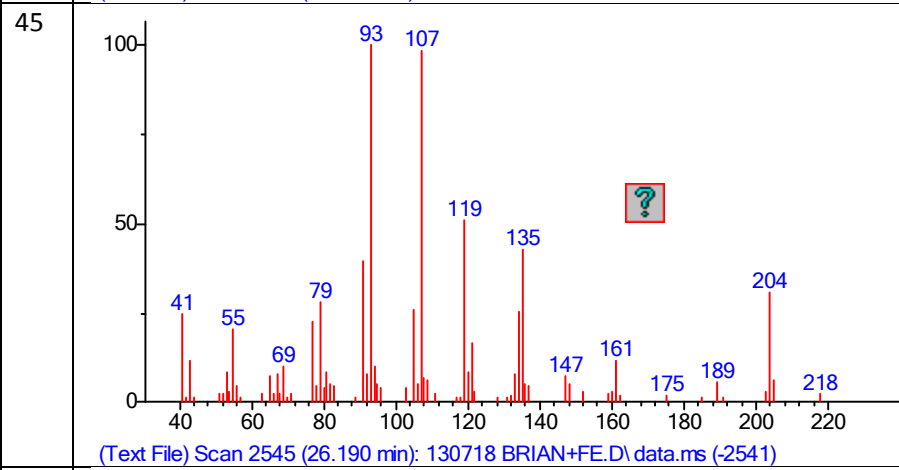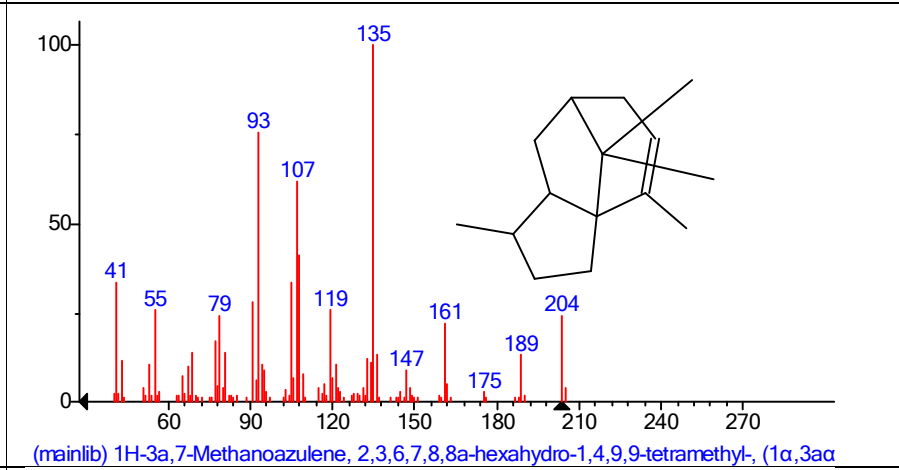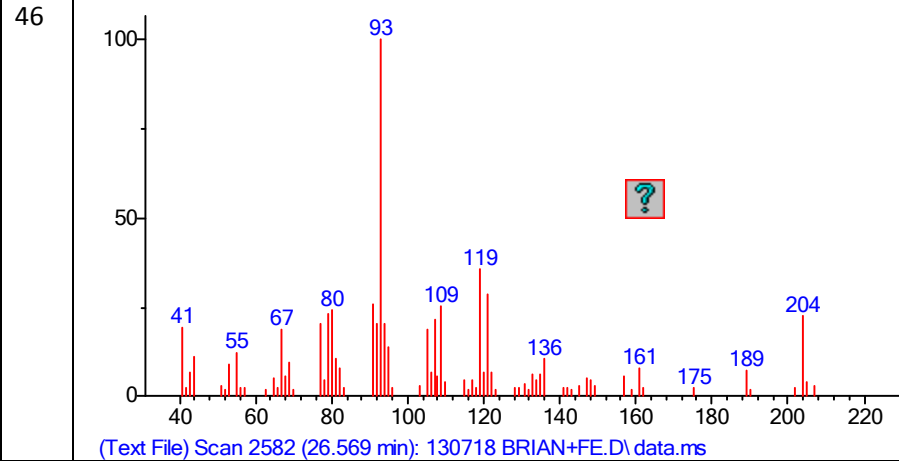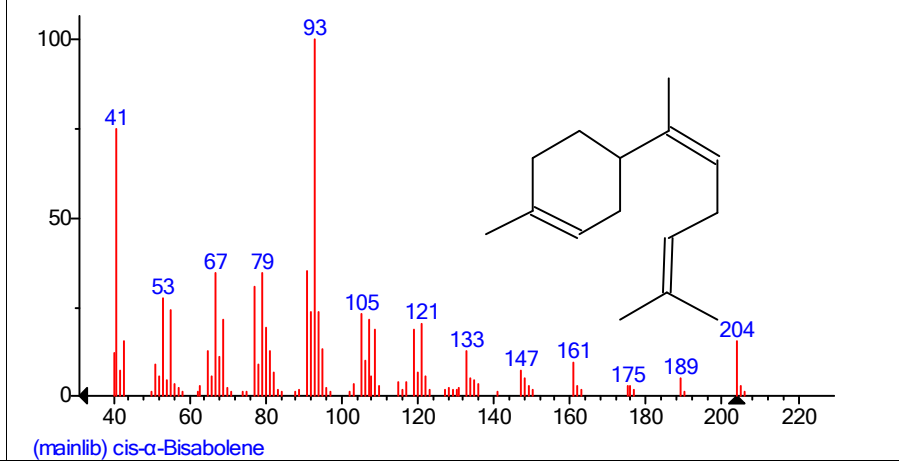

47

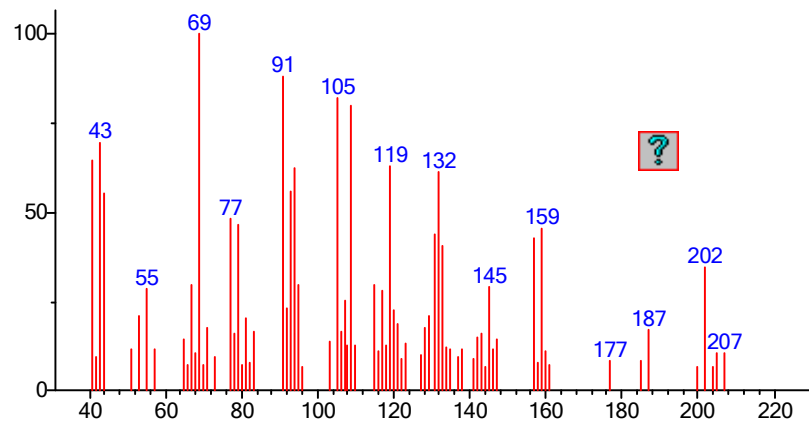

(Text File) Scan 2598 (26.733 min): 130718 BRIAN+FE.D\data.ms

48

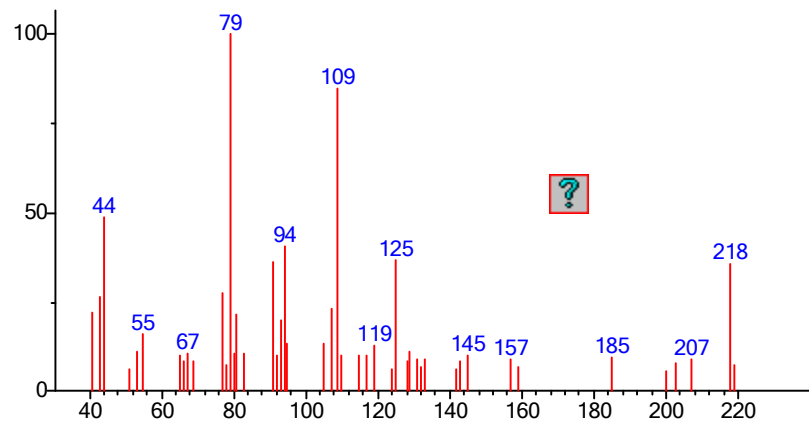

(Text File) Scan 2615 (26.908 min): 130718 BRIAN+FE.D\data.ms

49

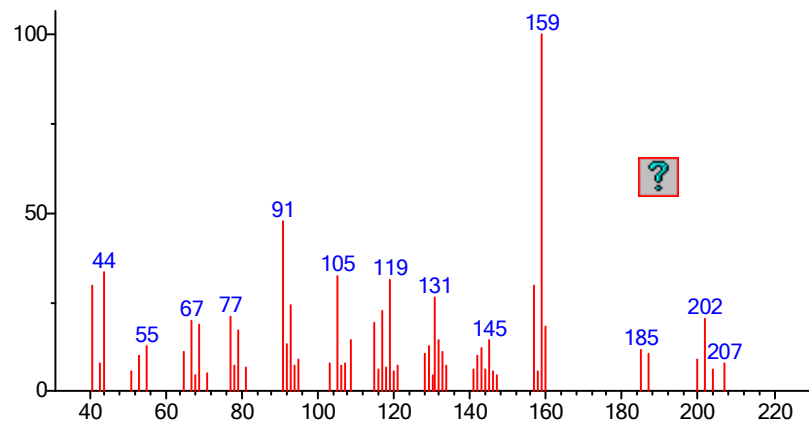

(Text File) Scan 2638 (27.144 min): 130718 BRIAN+FE.D\data.ms

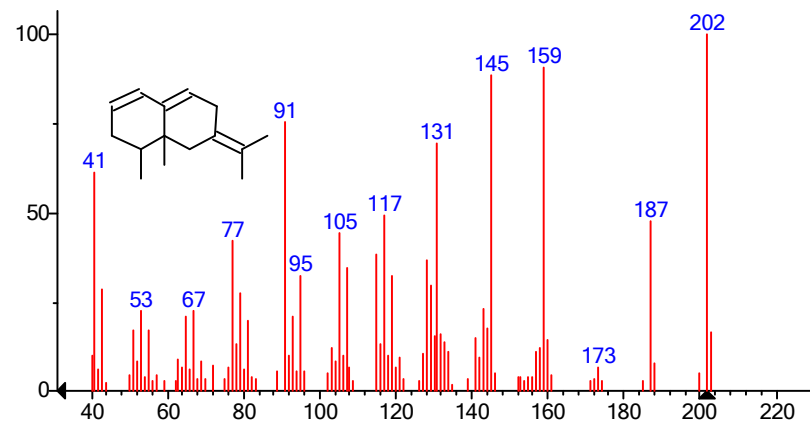(mainlib)  $\beta$ -Vatirene

50

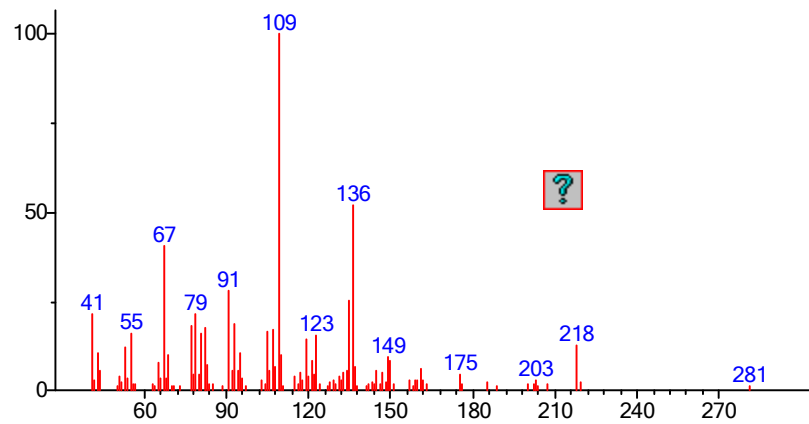

(Text File) Scan 2669 (27.462 min): 130718 BRIAN+FE.D\data.ms

51

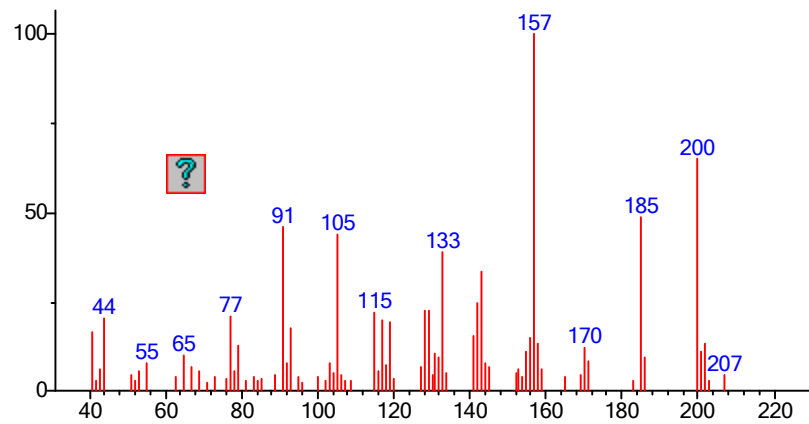

(Text File) Scan 2695 (27.728 min): 130718 BRIAN+FE.D\data.ms

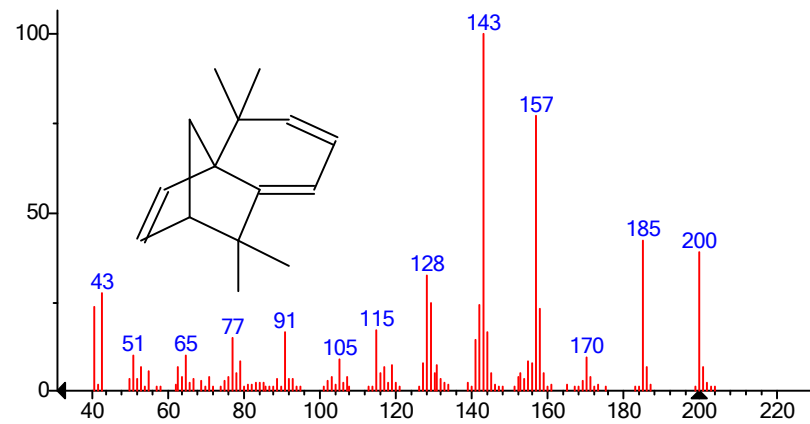

(mainlib) Isolongifolene, 4,5,9,10-dehydro-

52

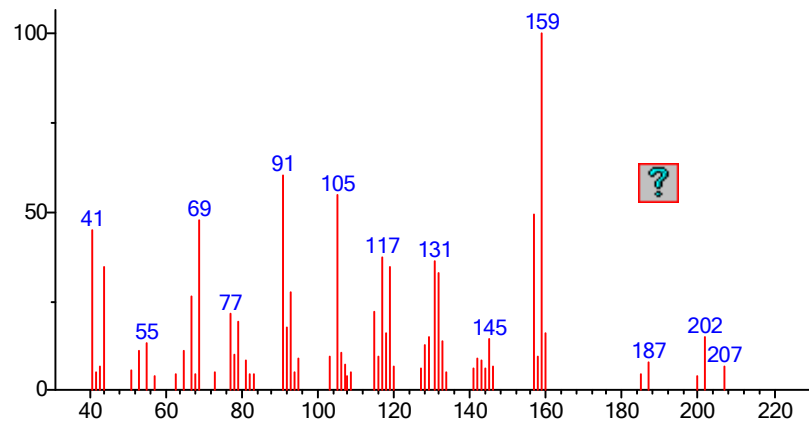

(Text File) Scan 2710 (27.882 min): 130718 BRIAN+FE.D\data.ms

53

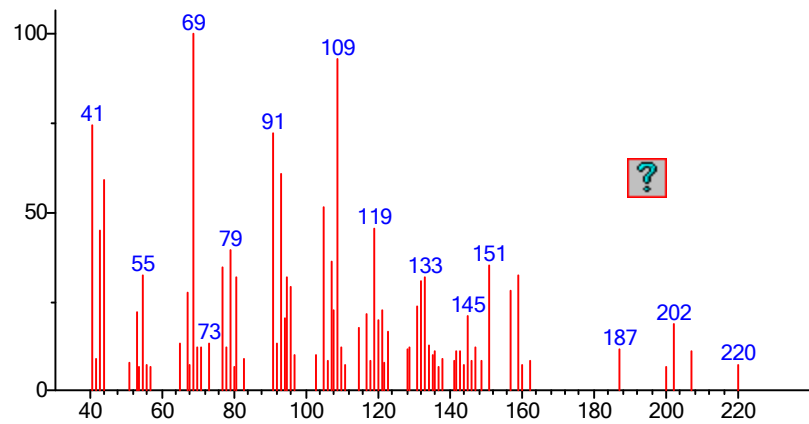

(Text File) Scan 2742 (28.210 min): 130718 BRIAN+FE.D\data.ms

54

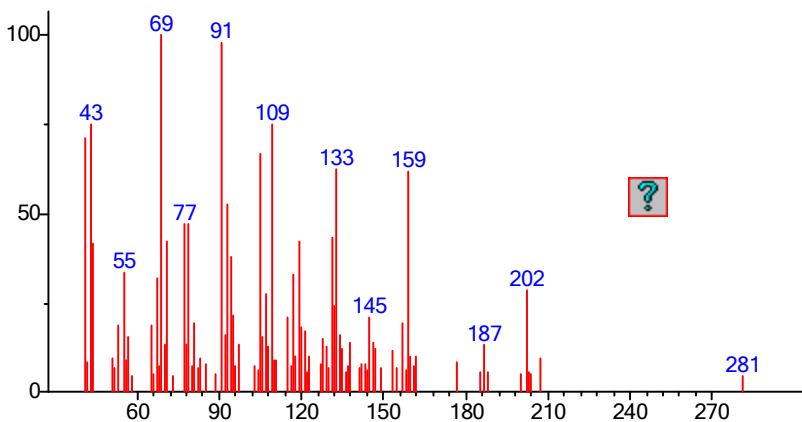

(Text File) Scan 2780 (28.600 min): 130718 BRIAN+FE.D\data.ms

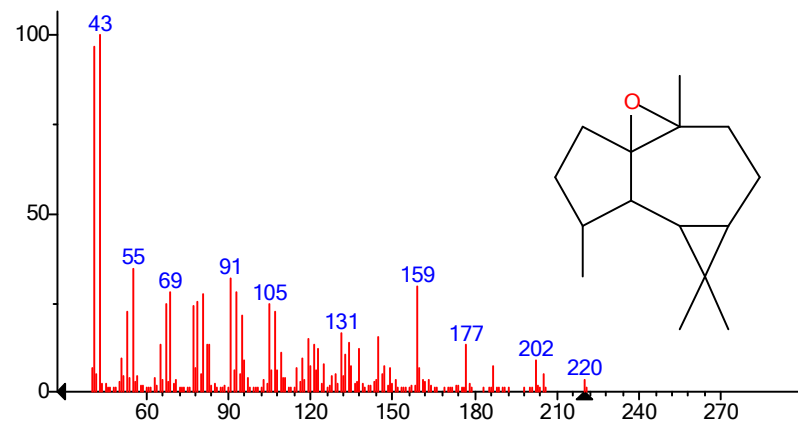

(mainlib) Ledene oxide-II

55

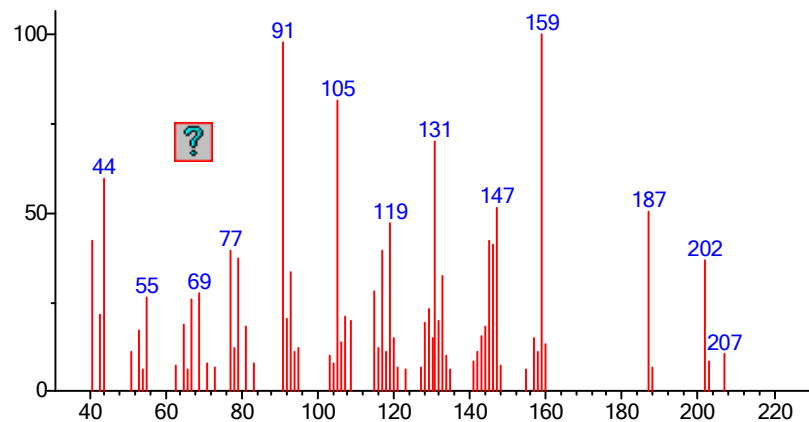

(Text File) Scan 2826 (29.072 min): 130718 BRIAN+FE.D\data.ms

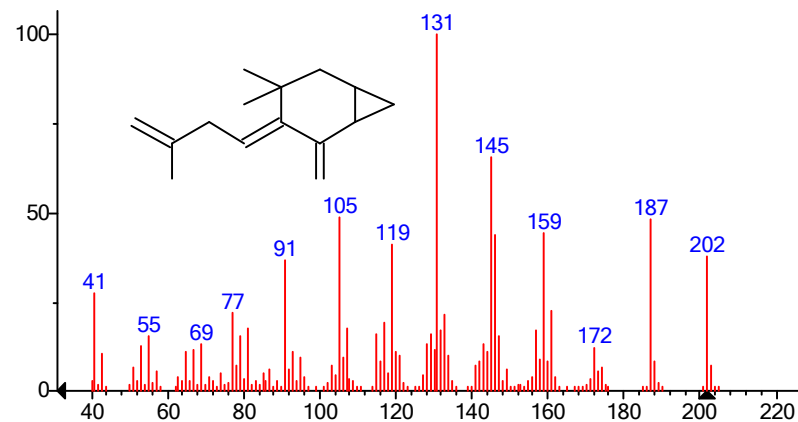

(mainlib) 4,4-Dimethyl-3-(3-methylbut-3-enylidene)-2-methylenebicyclo[4.1.0]heptane

56

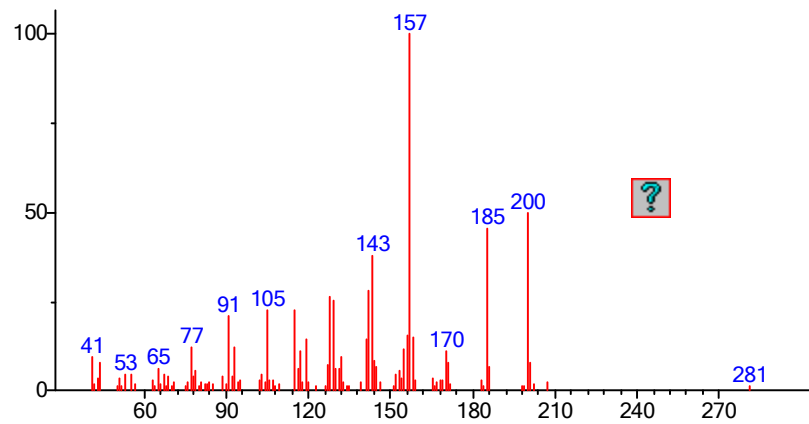

(Text File) Scan 2848 (29.298 min): 130718 BRIAN+FE.D\data.ms

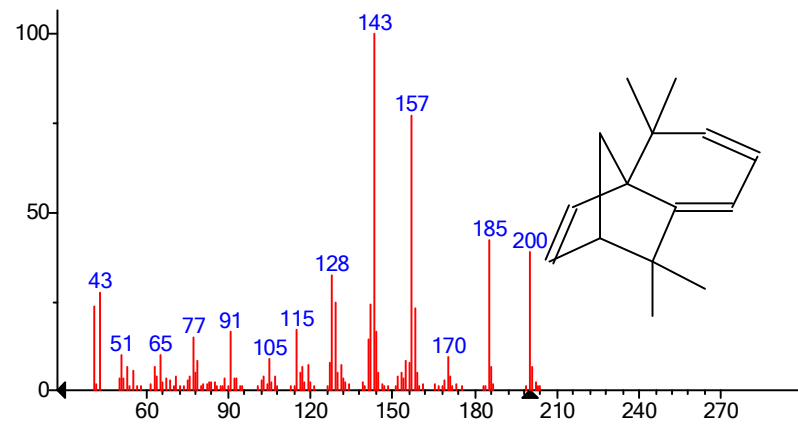

(mainlib) Isolongifolene, 4,5,9,10-dehydro-

57

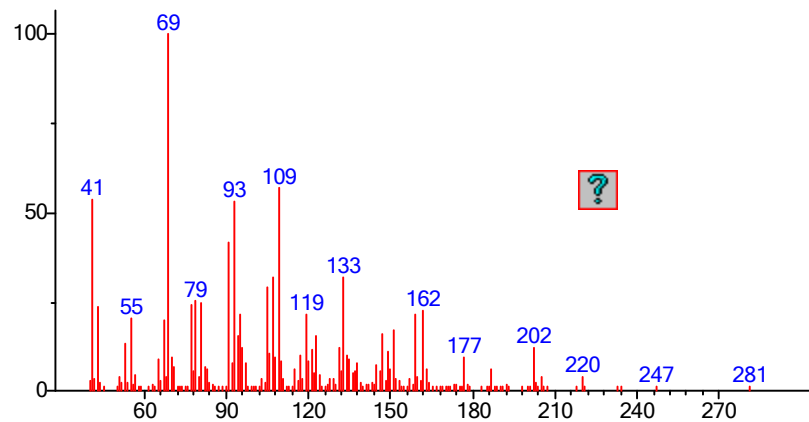

(Text File) Scan 2882 (29.646 min): 130718 BRIAN+FE.D\data.ms

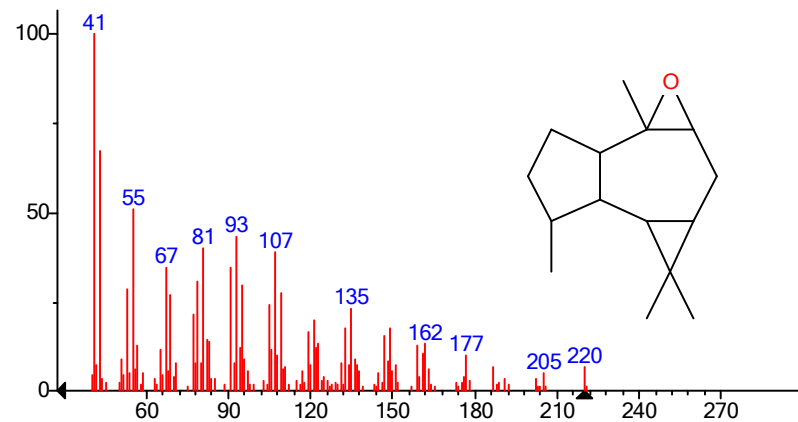

(mainlib) Isoaromadendrene epoxide

58

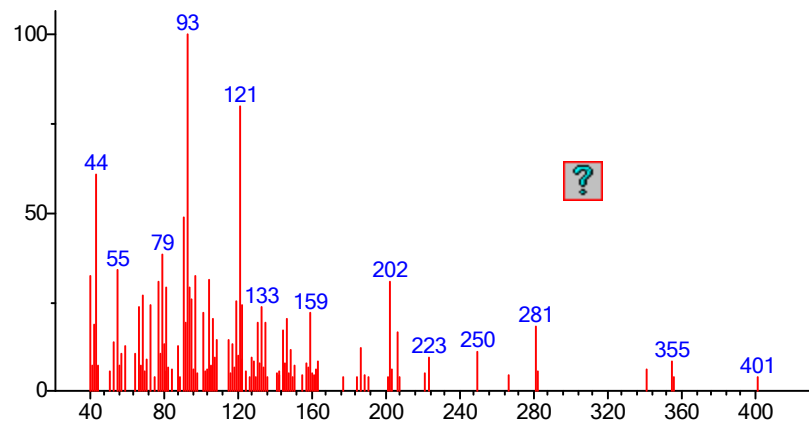

(Text File) Scan 2986 (30.713 min): 130718 BRIAN+FE.D\data.ms

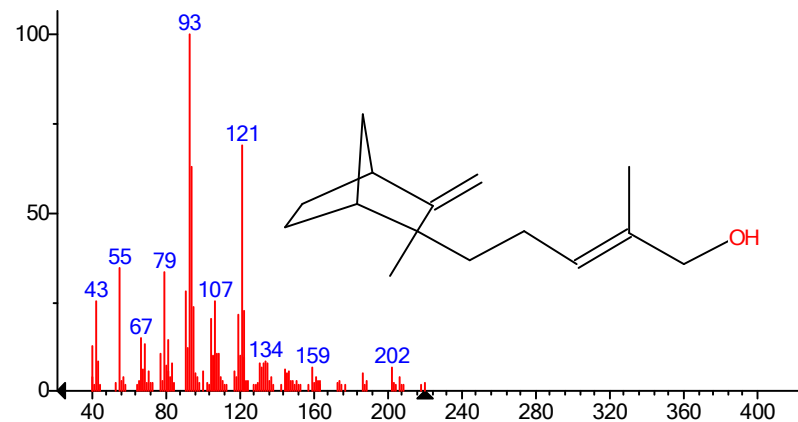

(mainlib) Santalol

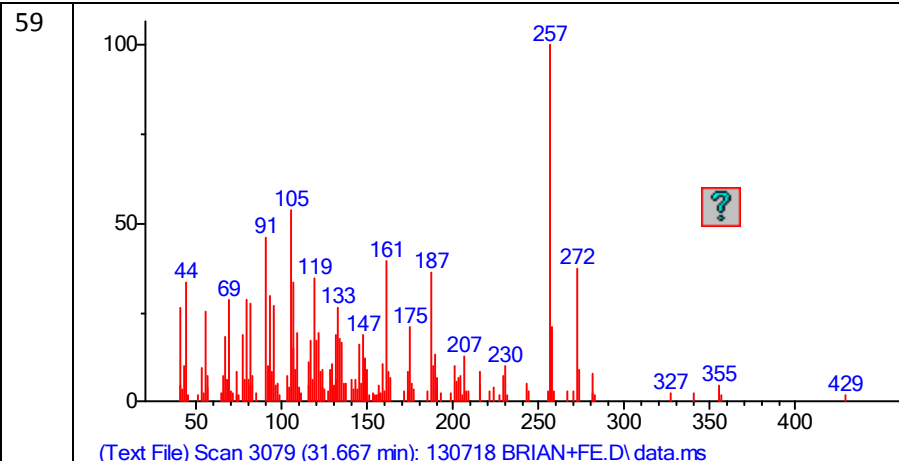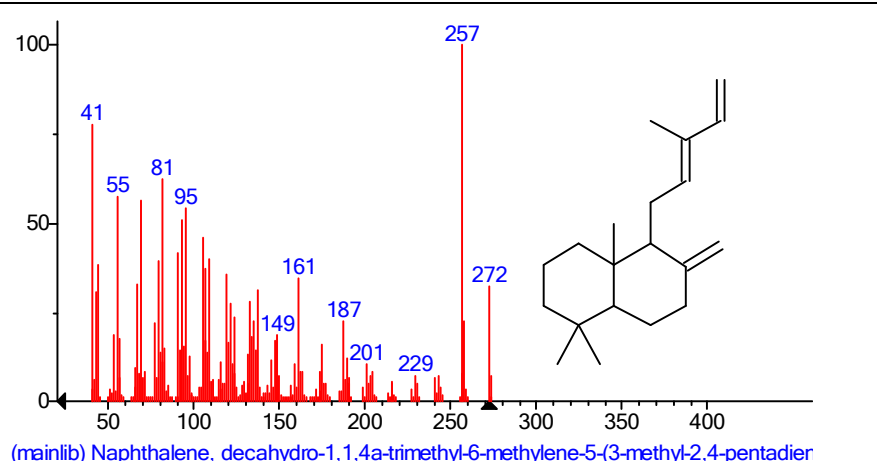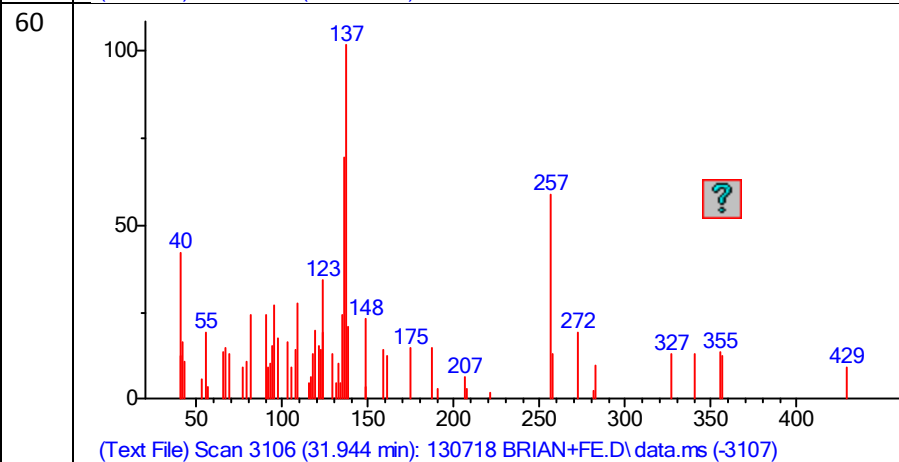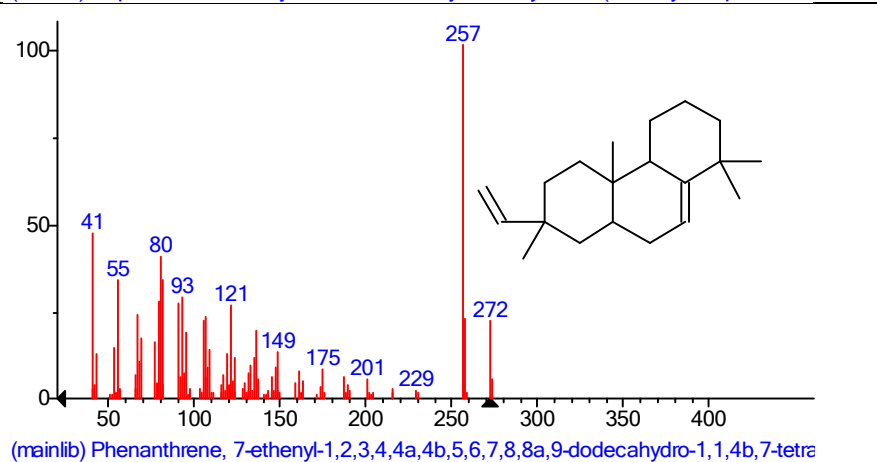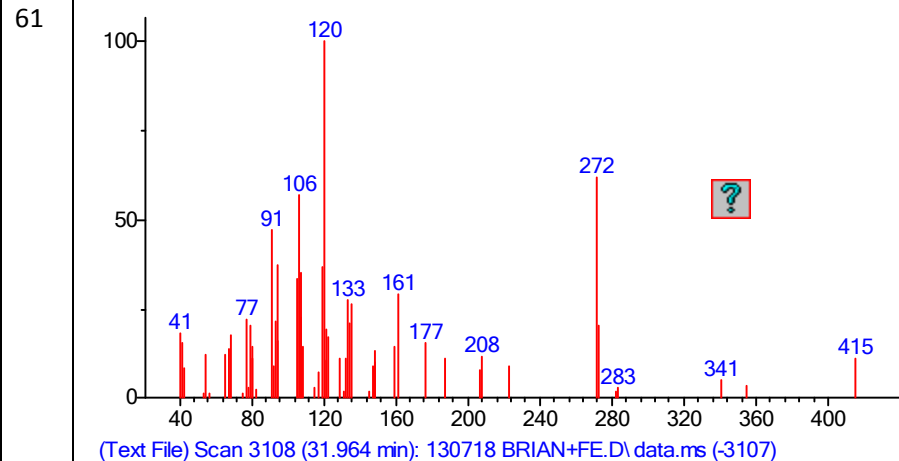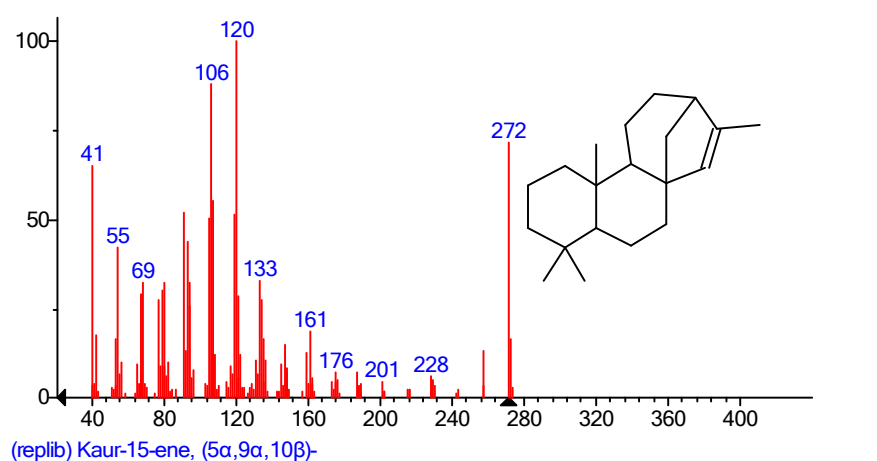

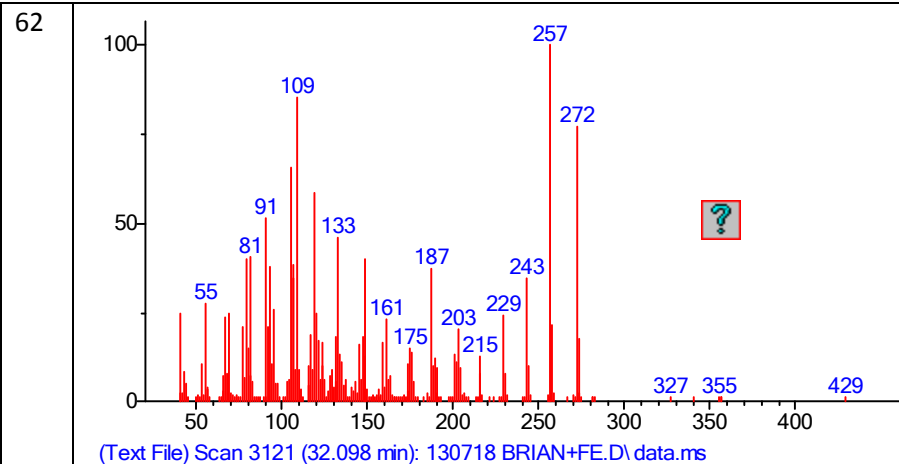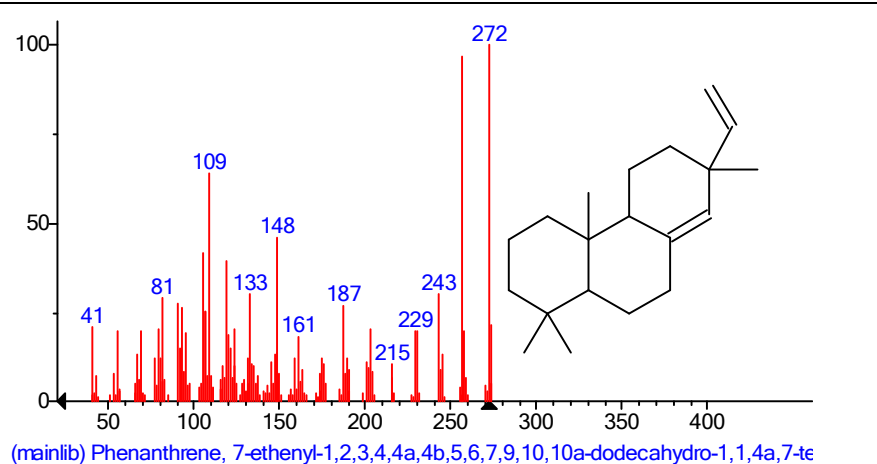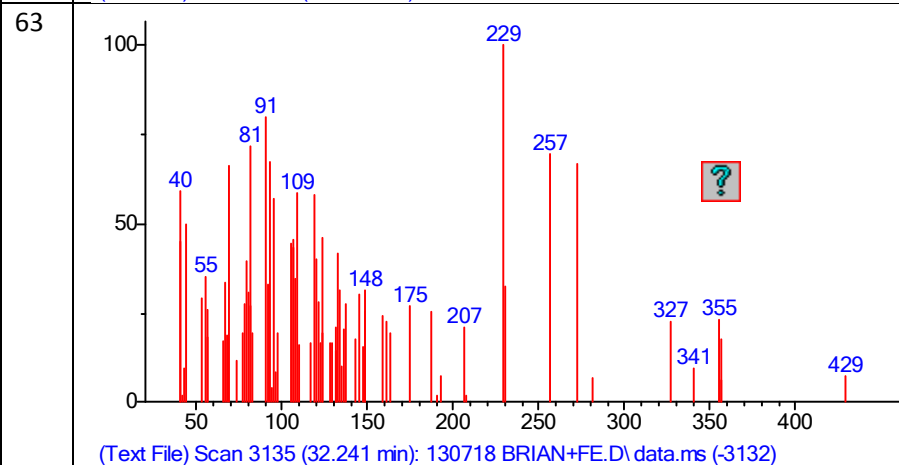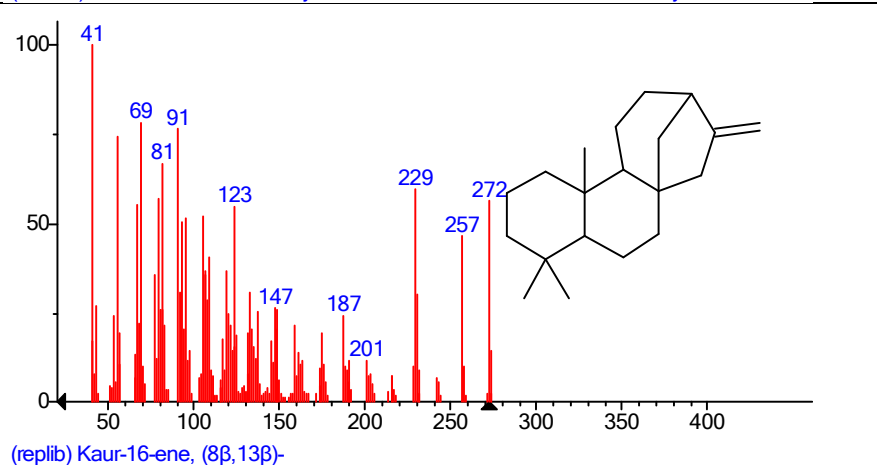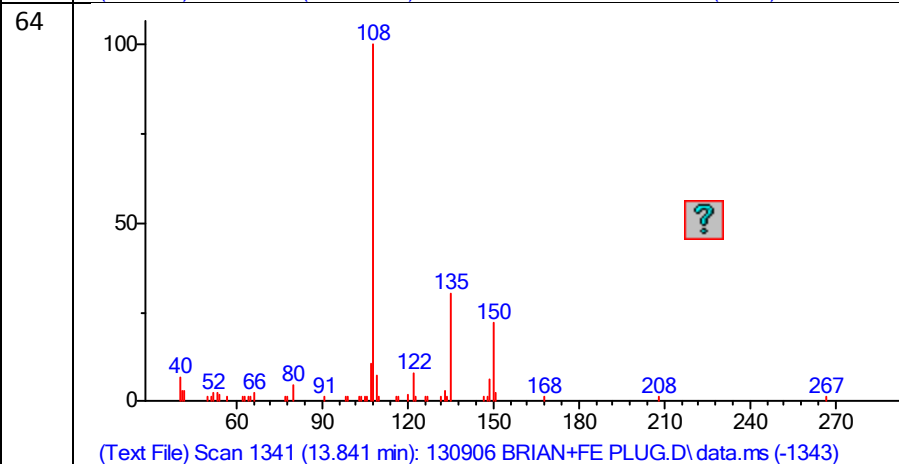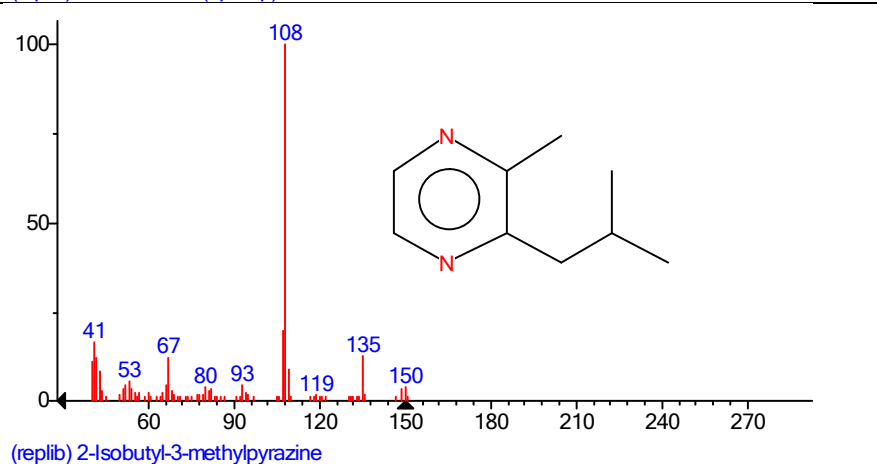

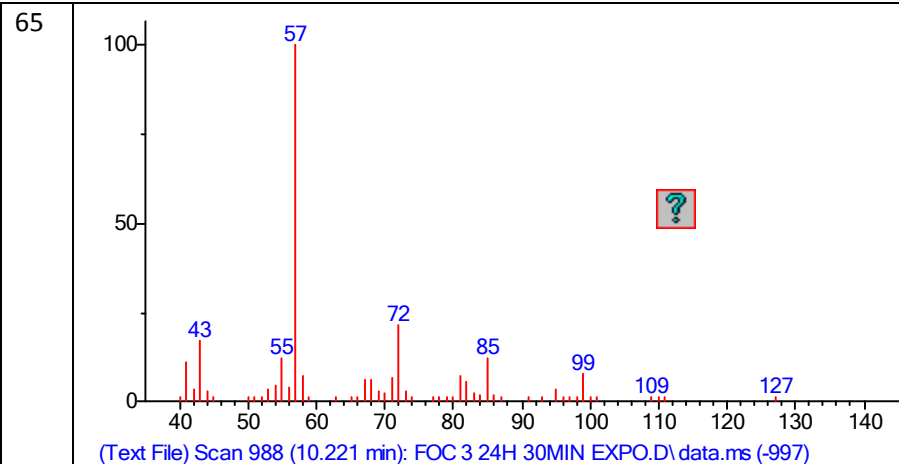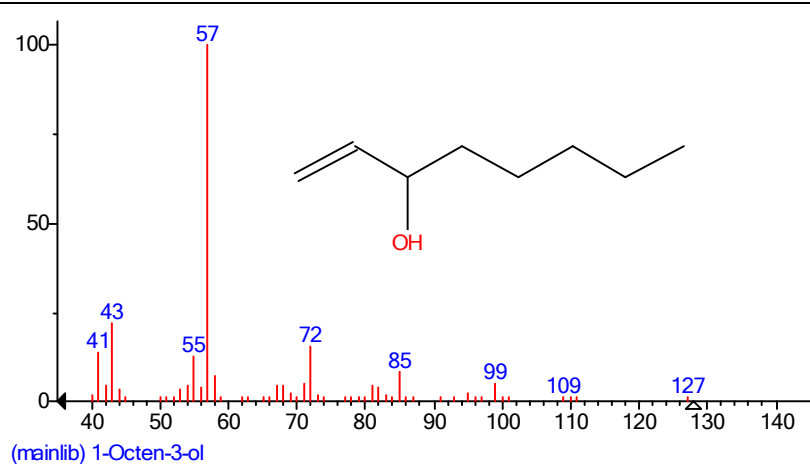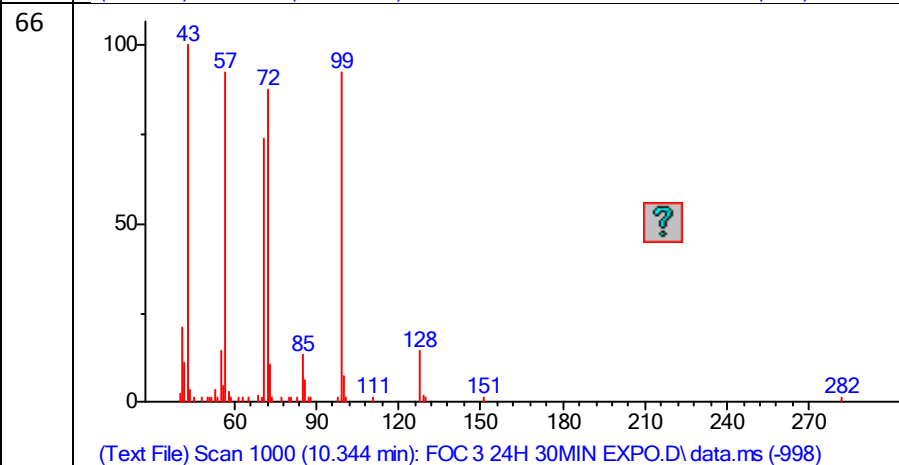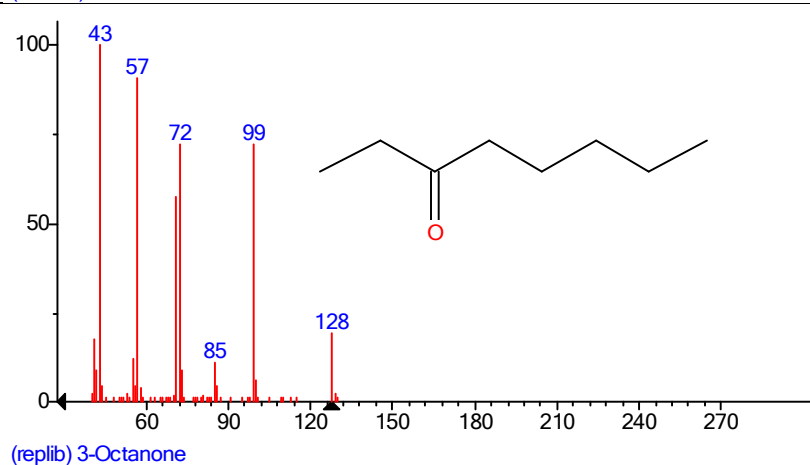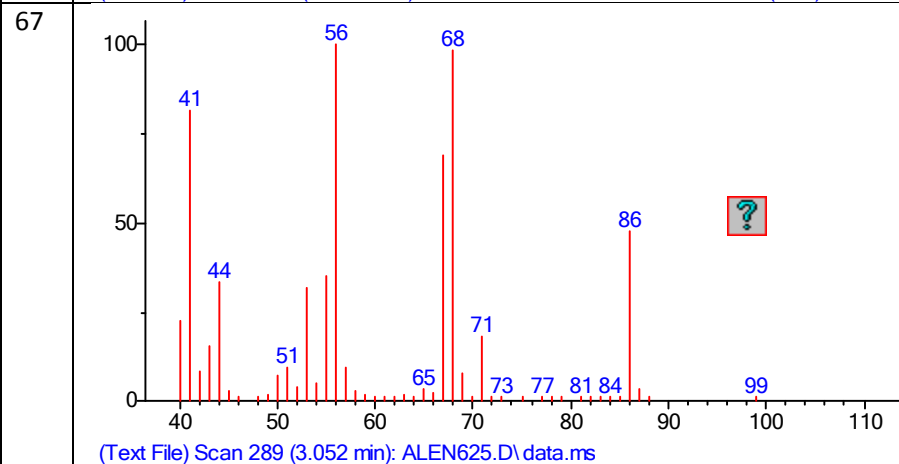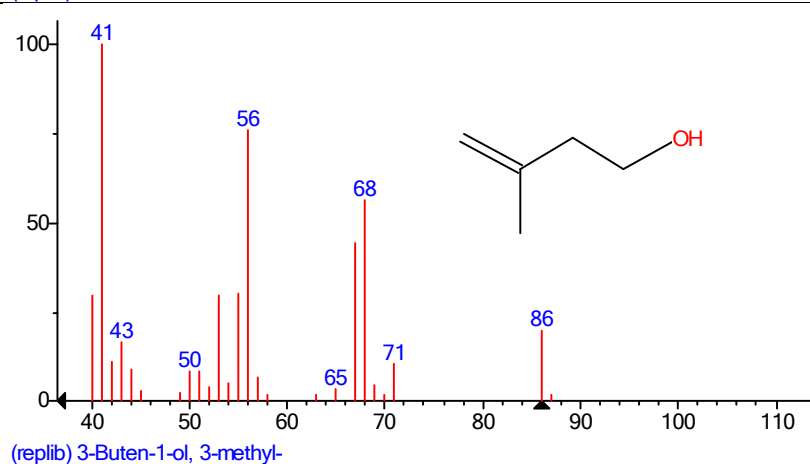



68

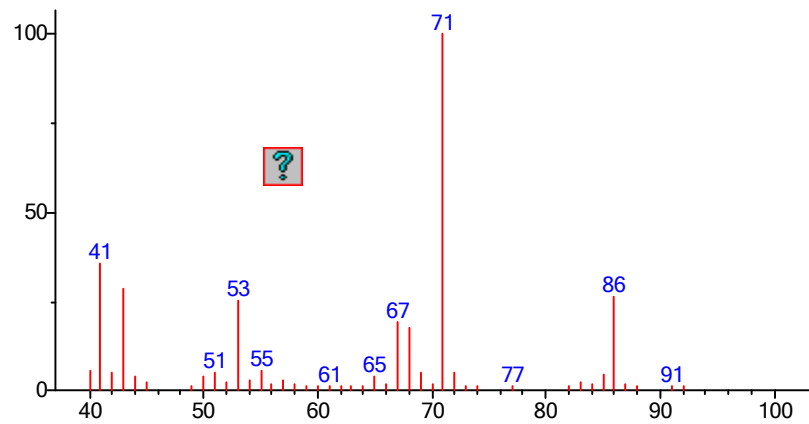

(Text File) Scan 482 (5.031 min): ALEN625.D\data.ms

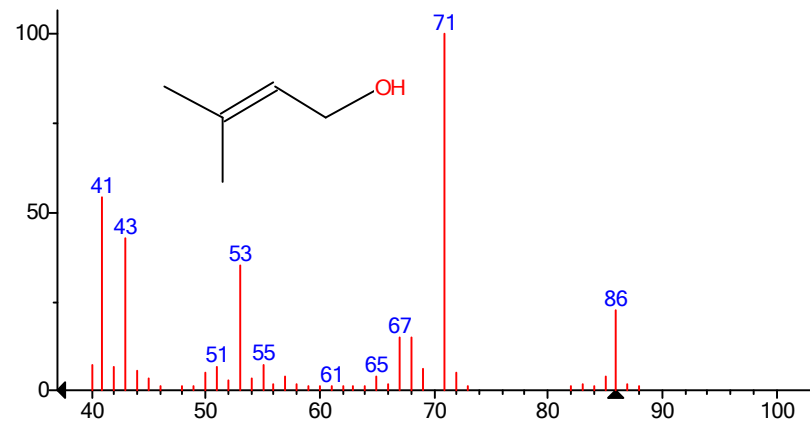

(mainlib) 2-Buten-1-ol, 3-methyl-

69

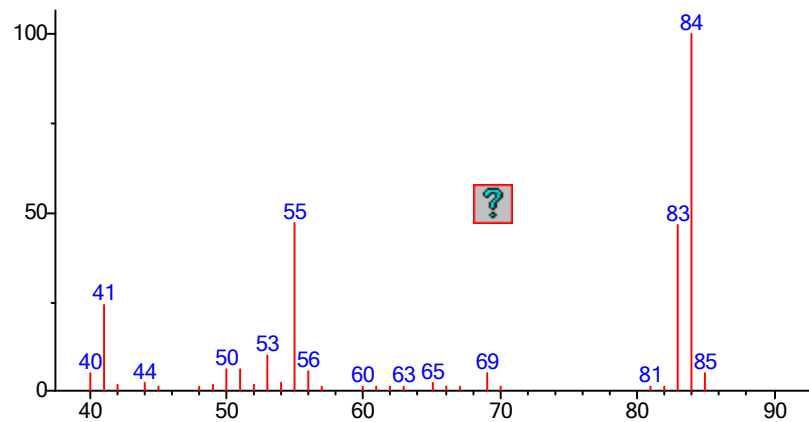

(Text File) Scan 506 (5.277 min): ALEN625.D\data.ms (-500)

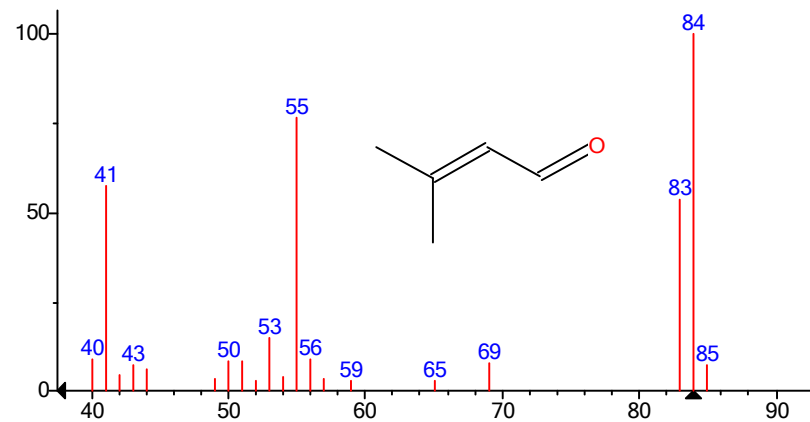

(mainlib) 2-Butenal, 3-methyl-

70

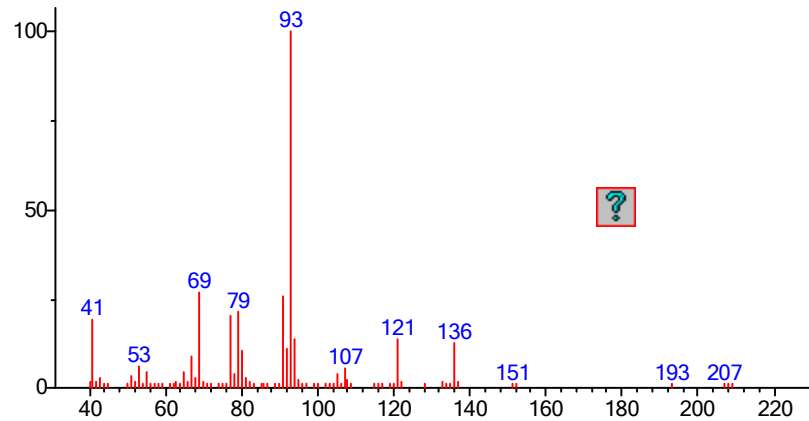

(Text File) Scan 999 (10.334 min): ALEN625.D\data.ms

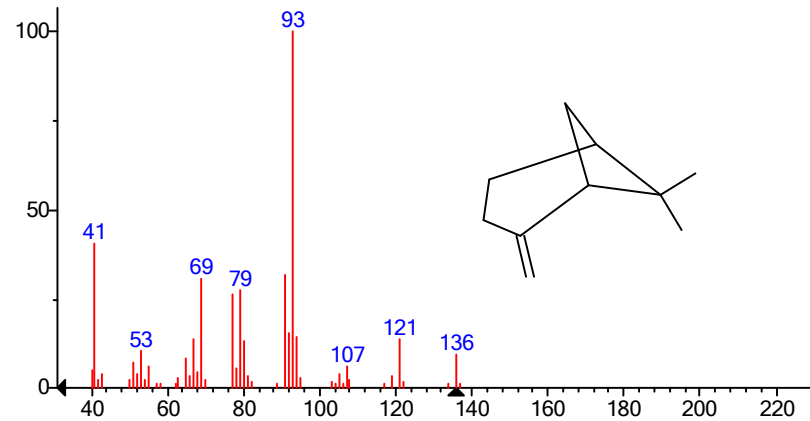

(replib) Bicyclo[3.1.1]heptane, 6,6-dimethyl-2-methylene-, (1S)-

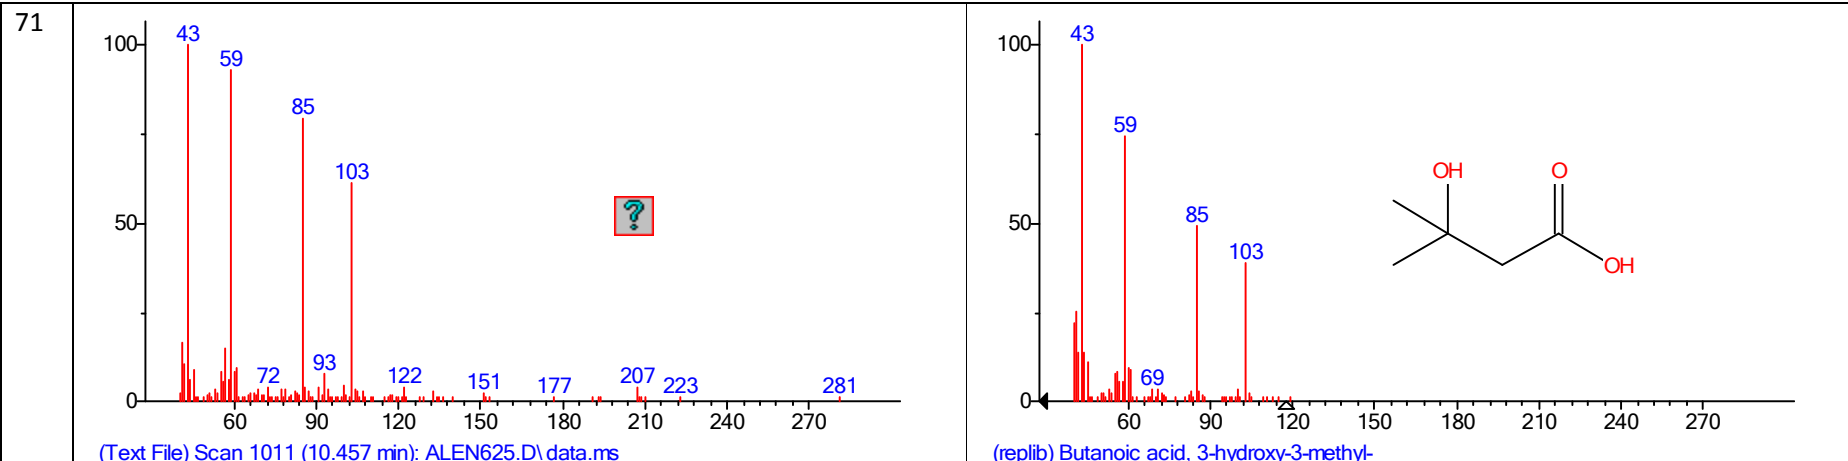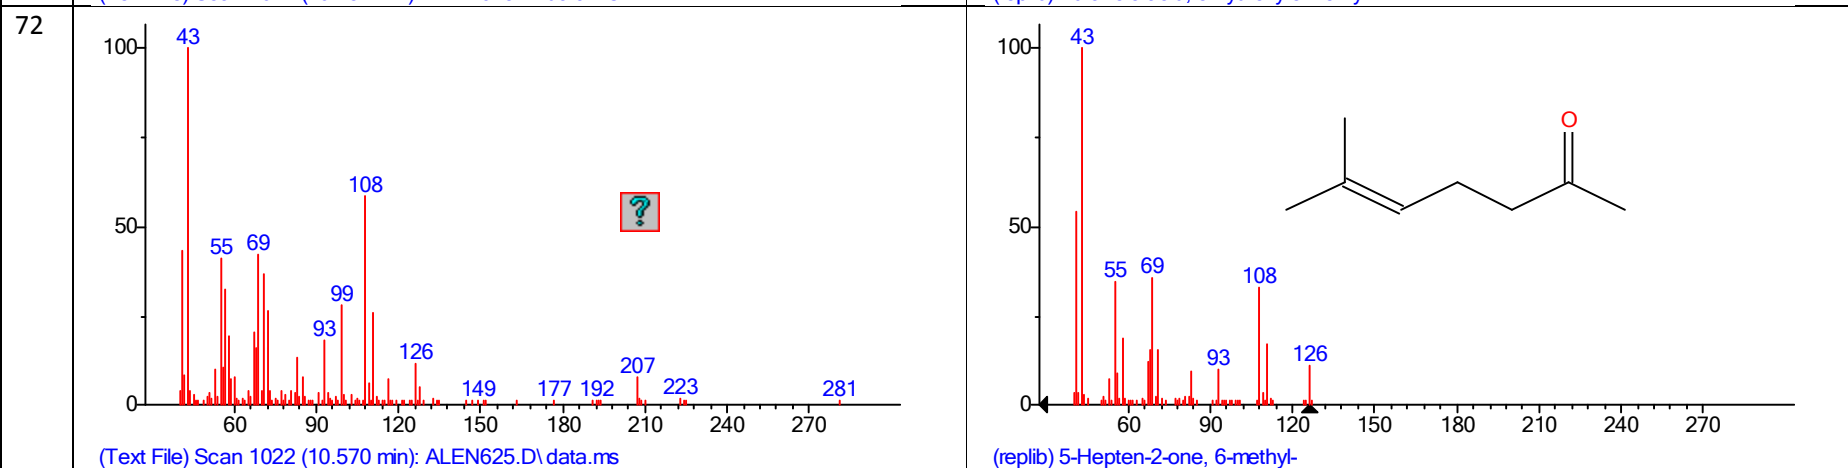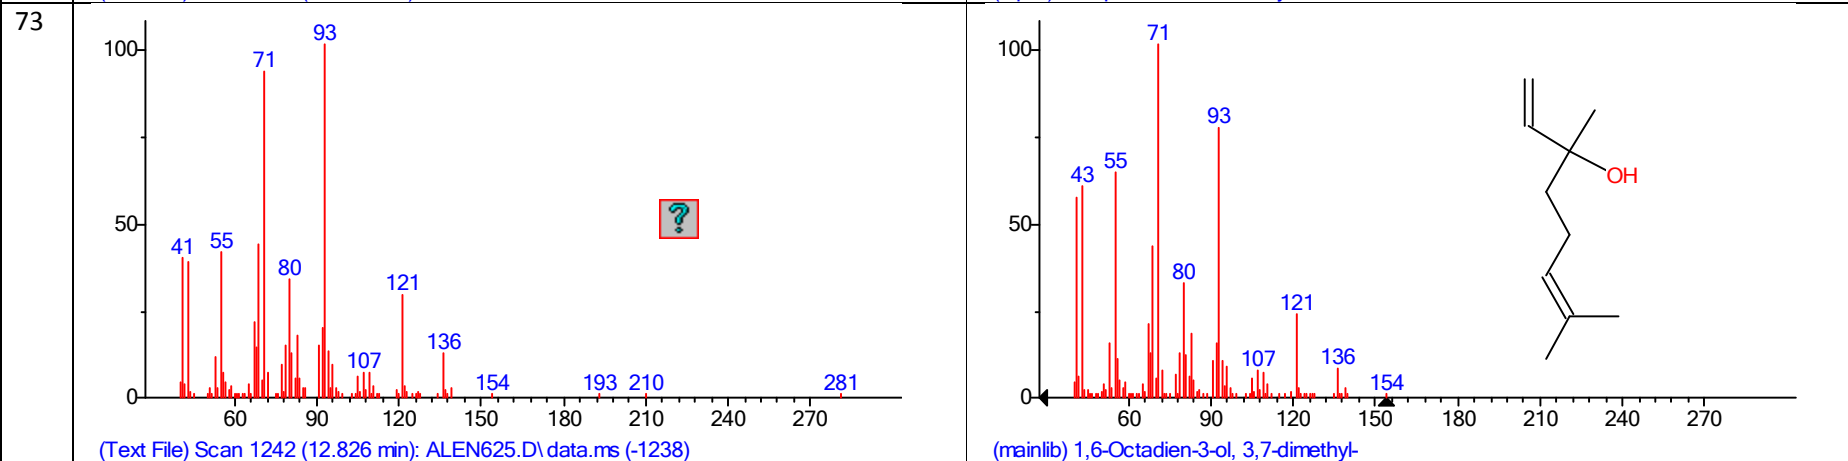

74

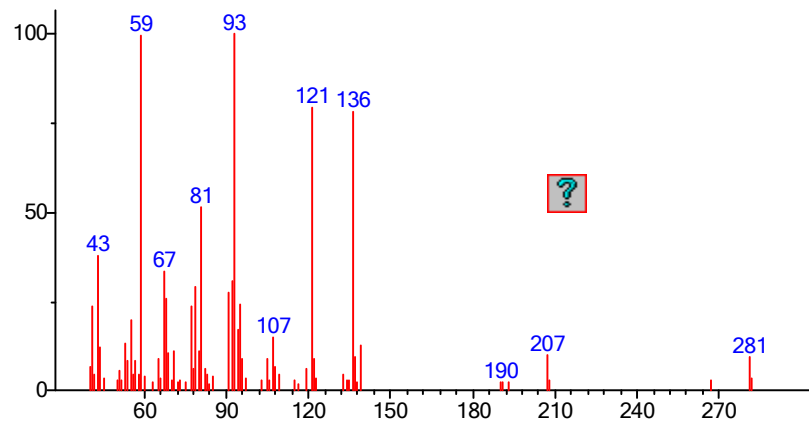

(Text File) Scan 1461 (15.072 min): ALEN625.D\data.ms

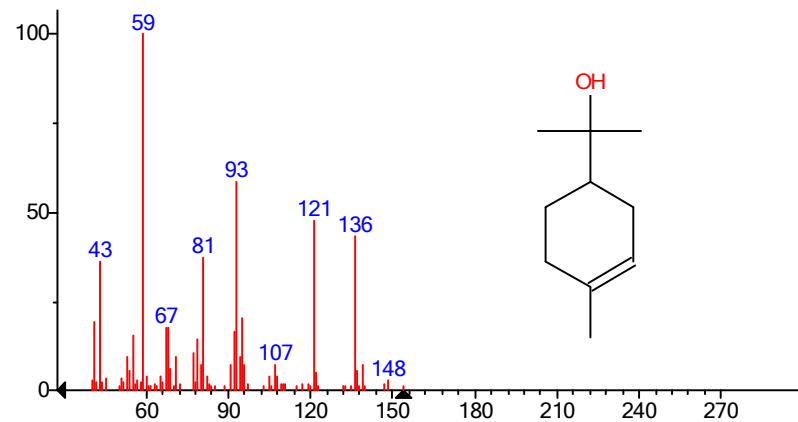(replib) 3-Cyclohexene-1-methanol,  $\alpha,\alpha,4$ -trimethyl-, (S)-

72

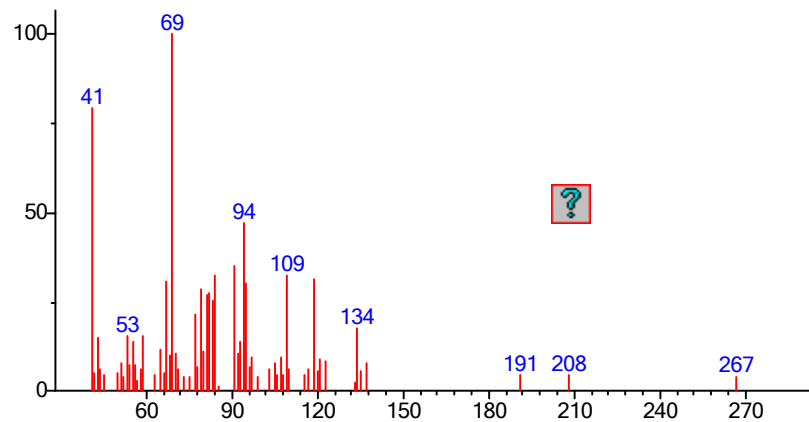

(Text File) Scan 1594 (16.436 min): ALEN625.D\data.ms (-1589)

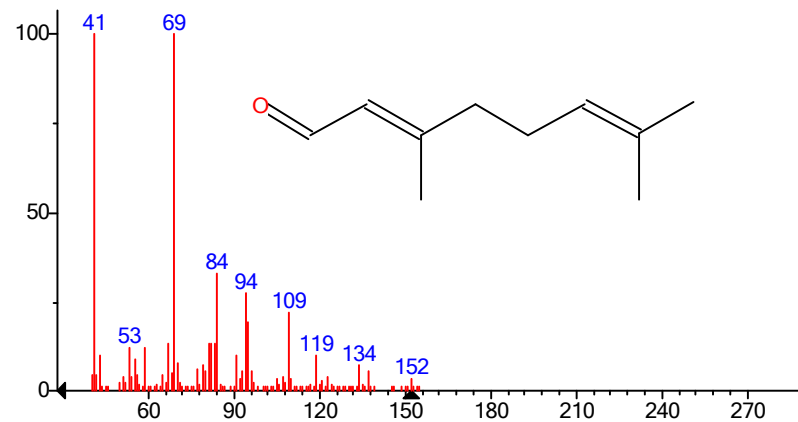

(replib) 2,6-Octadienal, 3,7-dimethyl-, (Z)-

76

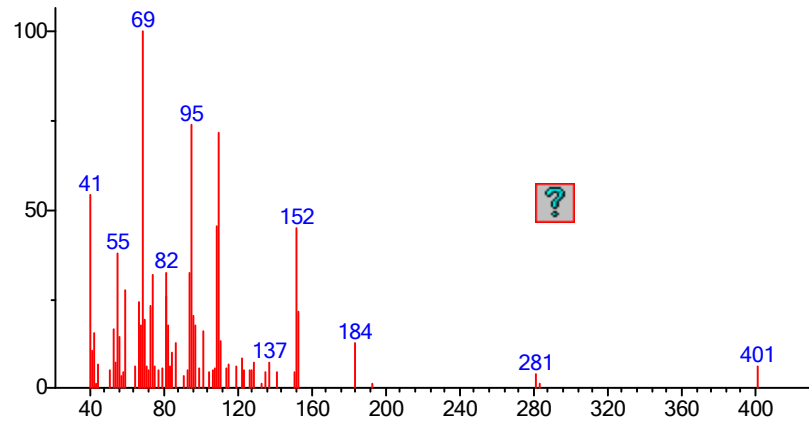

(Text File) Scan 1647 (16.980 min): ALEN625.D\data.ms (-1641)

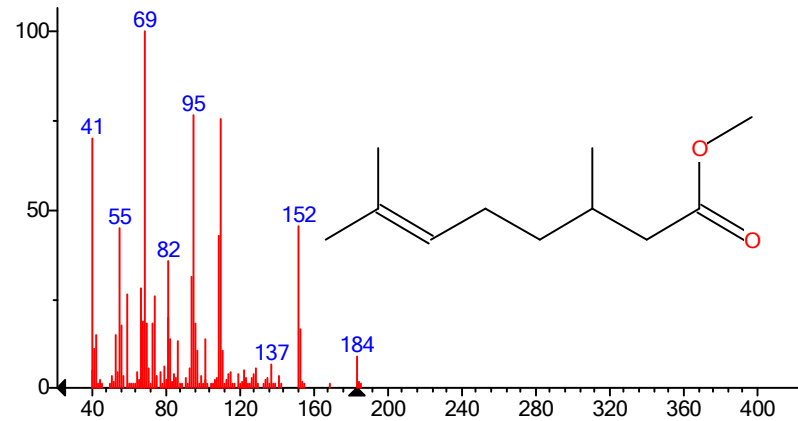

(mainlib) (S)-(-)-Citronellic acid, methyl ester

77

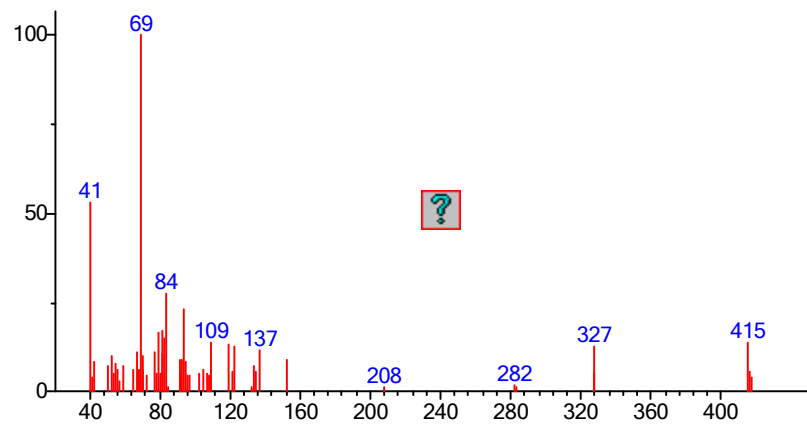

(Text File) Scan 1679 (17.308 min): ALEN625.D\data.ms (-1672)

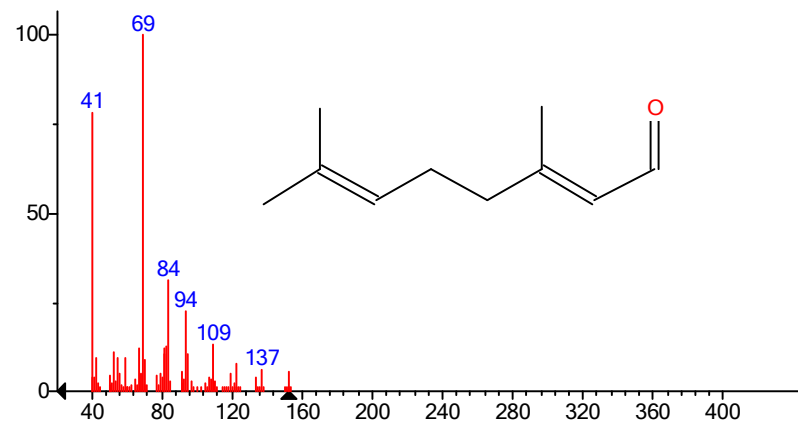

(replib) 2,6-Octadienal, 3,7-dimethyl-

78

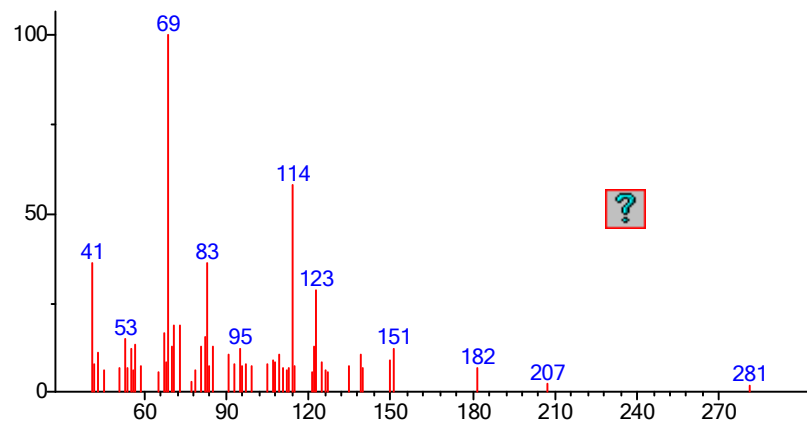

(Text File) Scan 1708 (17.606 min): ALEN625.D\data.ms (-1714)

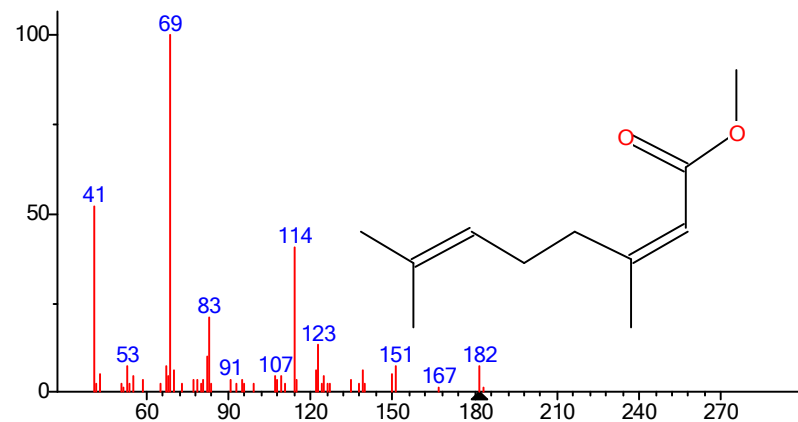

(mainlib) 2,6-Octadienoic acid, 3,7-dimethyl-, methyl ester, (Z)-

**Table S2: Background contaminant identifications according to NIST database search.** Shown are indentifications of the peaks in fig. S3 (left), the spectra of measured peaks (middle) and the spectra of the corresponding compounds found by NIST database search (right).

|                             |                                                               |                                                                                      |                                                                                       |
|-----------------------------|---------------------------------------------------------------|--------------------------------------------------------------------------------------|---------------------------------------------------------------------------------------|
| <b>Peak</b>                 | A                                                             | 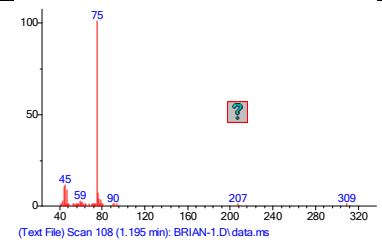   |    |
| <b>retention time (min)</b> | 1.195                                                         |                                                                                      |                                                                                       |
| <b>formula</b>              | C <sub>3</sub> H <sub>10</sub> OSi                            |                                                                                      |                                                                                       |
| <b>probability</b>          | 76 %                                                          |                                                                                      |                                                                                       |
| <b>trivial name</b>         | trimethylsilanol                                              |                                                                                      |                                                                                       |
| <b>Peak</b>                 | B                                                             |    |    |
| <b>retention time (min)</b> | 1.451                                                         |                                                                                      |                                                                                       |
| <b>formula</b>              | CHCl <sub>3</sub>                                             |                                                                                      |                                                                                       |
| <b>probability</b>          | 86.2 %                                                        |                                                                                      |                                                                                       |
| <b>trivial name</b>         | trichloromethane                                              |                                                                                      |                                                                                       |
| <b>Peak</b>                 | C                                                             |   |   |
| <b>retention time (min)</b> | 2.549                                                         |                                                                                      |                                                                                       |
| <b>formula</b>              | C <sub>2</sub> H <sub>8</sub> O <sub>2</sub> Si               |                                                                                      |                                                                                       |
| <b>probability</b>          | 86.4 %                                                        |                                                                                      |                                                                                       |
| <b>trivial name</b>         | dimethyl-silanediol                                           |                                                                                      |                                                                                       |
| <b>Peak</b>                 | D                                                             |  |  |
| <b>retention time (min)</b> | 6.672                                                         |                                                                                      |                                                                                       |
| <b>formula</b>              | C <sub>6</sub> H <sub>18</sub> O <sub>3</sub> Si <sub>3</sub> |                                                                                      |                                                                                       |
| <b>probability</b>          | 96.2 %                                                        |                                                                                      |                                                                                       |
| <b>trivial name</b>         | hexamethyl-cyclotrisiloxane,                                  |                                                                                      |                                                                                       |
| <b>Peak</b>                 | E                                                             |  |  |
| <b>retention time (min)</b> | 8.959                                                         |                                                                                      |                                                                                       |
| <b>formula</b>              | C <sub>8</sub> H <sub>9</sub> NO <sub>2</sub>                 |                                                                                      |                                                                                       |
| <b>probability</b>          | 82.7 %                                                        |                                                                                      |                                                                                       |
| <b>trivial name</b>         | methoxy-phenyl-oxime                                          |                                                                                      |                                                                                       |
| <b>Peak</b>                 | F                                                             |  |  |
| <b>retention time (min)</b> | 9.995                                                         |                                                                                      |                                                                                       |
| <b>formula</b>              | C <sub>14</sub> H <sub>22</sub> O <sub>3</sub> Si             |                                                                                      |                                                                                       |
| <b>probability</b>          | 29.3 %                                                        |                                                                                      |                                                                                       |
| <b>trivial name</b>         | vanillin-tert-butyl dimethylsilyl ether                       |                                                                                      |                                                                                       |

|                             |                                           |                                                                                      |                                                                                       |
|-----------------------------|-------------------------------------------|--------------------------------------------------------------------------------------|---------------------------------------------------------------------------------------|
| <b>Peak</b>                 | G                                         | 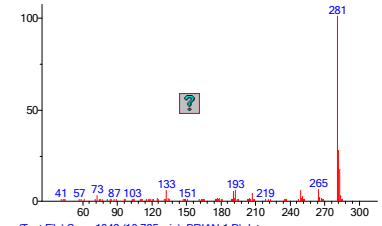   |    |
| <b>retention time (min)</b> | 10.785                                    |                                                                                      |                                                                                       |
| <b>formula</b>              | $C_8H_{24}O_4Si_4$                        |                                                                                      |                                                                                       |
| <b>probability</b>          | 95 %                                      |                                                                                      |                                                                                       |
| <b>trivial name</b>         | octamethyl-cyclotetrasiloxane             |                                                                                      |                                                                                       |
| <b>Peak</b>                 | H                                         |    |    |
| <b>retention time (min)</b> | 13.072                                    |                                                                                      |                                                                                       |
| <b>formula</b>              | $C_{13}H_{22}O_3Si_2$                     |                                                                                      |                                                                                       |
| <b>probability</b>          | 58.3 %                                    |                                                                                      |                                                                                       |
| <b>trivial name</b>         | 2,5-bis[(trimethylsilyl)oxy]-benzaldehyde |                                                                                      |                                                                                       |
| <b>Peak</b>                 | I                                         |    |    |
| <b>retention time (min)</b> | 14.005                                    |                                                                                      |                                                                                       |
| <b>formula</b>              | $C_8H_{24}O_4Si_4$                        |                                                                                      |                                                                                       |
| <b>probability</b>          | 86.5 %                                    |                                                                                      |                                                                                       |
| <b>trivial name</b>         | octamethyl-cyclotetrasiloxane             |                                                                                      |                                                                                       |
| <b>Peak</b>                 | J                                         |   |   |
| <b>retention time (min)</b> | 19.061                                    |                                                                                      |                                                                                       |
| <b>formula</b>              | $C_{12}H_{36}O_6Si_6$                     |                                                                                      |                                                                                       |
| <b>probability</b>          | 97.8 %                                    |                                                                                      |                                                                                       |
| <b>trivial name</b>         | dodecamethyl-cyclohexasiloxane            |                                                                                      |                                                                                       |
| <b>Peak</b>                 | K                                         |  |  |
| <b>retention time (min)</b> | 25.102                                    |                                                                                      |                                                                                       |
| <b>formula</b>              | $C_{14}H_{42}O_7Si_7$                     |                                                                                      |                                                                                       |
| <b>probability</b>          | 86.4 %                                    |                                                                                      |                                                                                       |
| <b>trivial name</b>         | tetradecamethyl-cycloheptasiloxane        |                                                                                      |                                                                                       |
| <b>Peak</b>                 | L                                         |  |  |
| <b>retention time (min)</b> | 25.379                                    |                                                                                      |                                                                                       |
| <b>formula</b>              | $C_{14}H_{22}O$                           |                                                                                      |                                                                                       |
| <b>probability</b>          | 59.2 %                                    |                                                                                      |                                                                                       |
| <b>trivial name</b>         | 2,4-bis(1,1-dimethylethyl)-phenol         |                                                                                      |                                                                                       |
| <b>Peak</b>                 | M                                         |  |  |
| <b>retention time (min)</b> | 28.426                                    |                                                                                      |                                                                                       |
| <b>formula</b>              | $C_{16}H_{30}O_4$                         |                                                                                      |                                                                                       |
| <b>probability</b>          | 56.2 %                                    |                                                                                      |                                                                                       |
| <b>trivial name</b>         | 2,2,4-trimethyl-3-carboxyisobutylester    |                                                                                      |                                                                                       |

|                             |                                  |                                                                              |                                                     |
|-----------------------------|----------------------------------|------------------------------------------------------------------------------|-----------------------------------------------------|
| <b>Peak</b>                 | N                                |                                                                              |                                                     |
| <b>retention time (min)</b> | 30.036                           |                                                                              |                                                     |
| <b>formula</b>              | $C_{16}H_{48}O_8Si_8$            |                                                                              |                                                     |
| <b>probability</b>          | 94.9 %                           |                                                                              |                                                     |
| <b>trivial name</b>         | hexadecamethyl-cyclooctasiloxane |                                                                              |                                                     |
|                             |                                  | <p>(Text File) Scan 2920 (30.036 min): BRIAN-1.D\data.ms</p>                 | <p>(mainlib) Cyclooctasiloxane, hexadecamethyl-</p> |
| <b>Peak</b>                 | O                                |                                                                              |                                                     |
| <b>retention time (min)</b> | 31.154                           |                                                                              |                                                     |
| <b>formula</b>              | $C_{18}H_{54}O_9Si_9$            |                                                                              |                                                     |
| <b>probability</b>          | 89.7 %                           |                                                                              |                                                     |
| <b>trivial name</b>         | octadecamethyl-cyclononasiloxane |                                                                              |                                                     |
|                             |                                  | <p>(Text File) Scan 3029 (31.154 min): BRIAN-1.D\data.ms</p>                 | <p>(mainlib) Cyclononasiloxane, octadecamethyl-</p> |
| <b>Peak</b>                 | P                                |                                                                              |                                                     |
| <b>retention time (min)</b> | 31.861                           |                                                                              |                                                     |
| <b>formula</b>              | $C_{18}H_{54}O_9Si_9$            |                                                                              |                                                     |
| <b>probability</b>          | 61.4 %                           |                                                                              |                                                     |
| <b>trivial name</b>         | octadecamethyl-cyclononasiloxane |                                                                              |                                                     |
|                             |                                  | <p>(Text File) Scan 3098 (31.861 min): BRIAN-1.D\data.ms (-3094) (-3107)</p> | <p>(mainlib) Cyclononasiloxane, octadecamethyl-</p> |

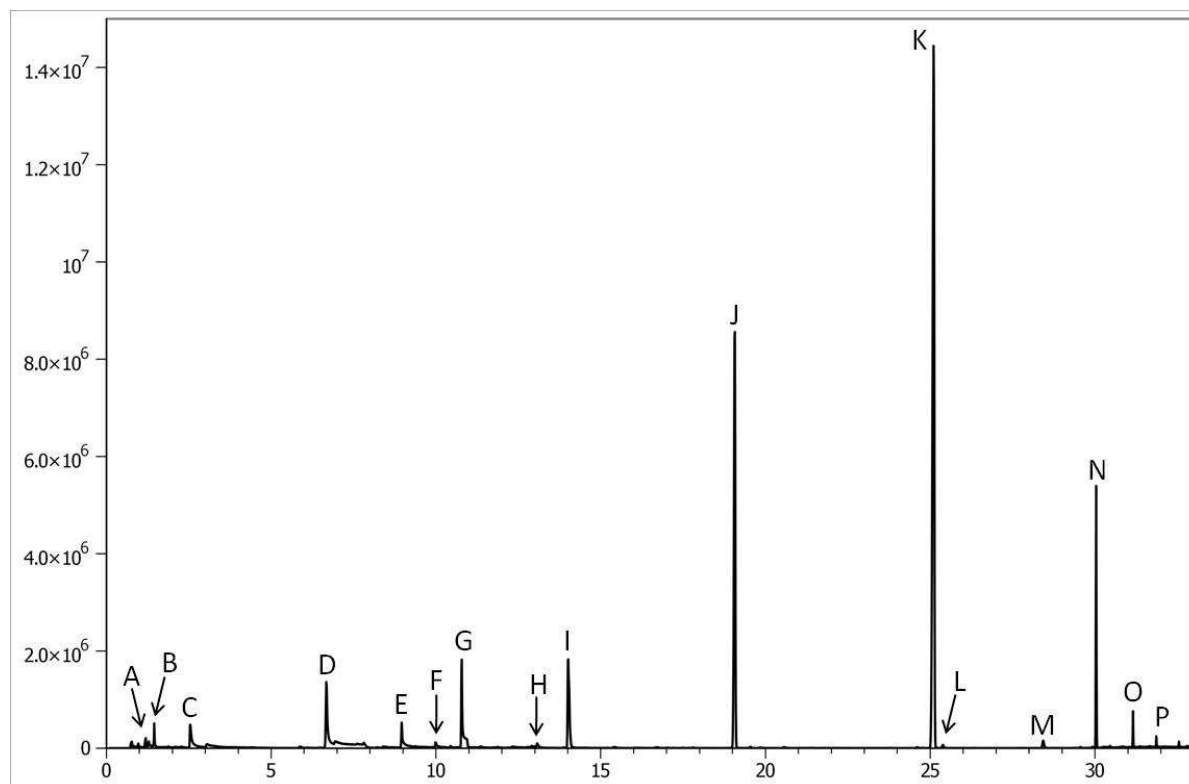

**Figure S1: Analysis of background contaminants indicated in the main article by the (⌘)-symbol.**

X-axis: time in minutes; Y-axis: ion count; medium: Brian's broth after 48 h incubation. Signals from this experimental control either origin from the SPME fiber or the sample vials, Brian medium itself does not release VOCs. Identifications are given in Table S2.



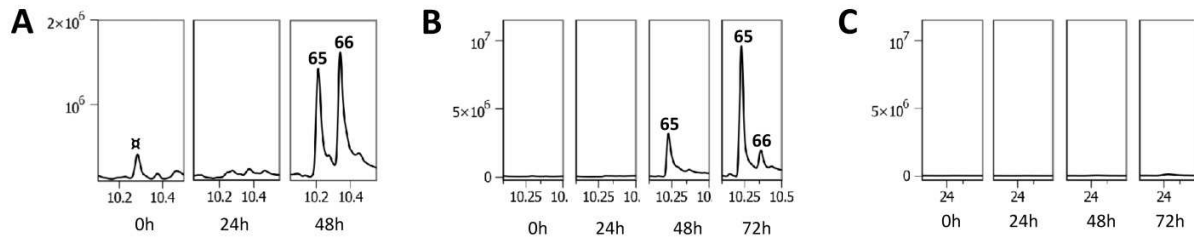

**Figure S2: Volatile compounds from lipid degradation produced by *Aspergillus fumigatus*.** X-axis: time in minutes; Y-axis: ion count. Contaminants are indicated by the (H)-symbol. 1-octen-3-ol (peak 65) and 3-octanon (peak 66) were detected in the headspace of the fermentation vessel. **(A)** Production of compounds 65 and 66 after 24 h and 48 h of fermentation. 0 h: control before inoculation. **(B)** The compounds 65 and 66 can be extracted by SPME of condensate collected at the outlet of the fermenter. **(C)** The condensate samples do not contain terpenes (shown for the retention time of compound 16).
